# Supplementary material for: Eating Attitudes of Patients with Celiac Disease in Brazil: A Nationwide Assessment with the EAT-26 Instrument
Source: MDPI journal article supplement (doi:10.3390/nu15224796), 2023-11-16
Supplement: s1 [file s1]

**Table S1.** Full description of answers collected from the online self-administered version of the Brazilian version of the EAT-26 Questionnaire.

| N<br>u<br>m<br>b<br>e<br>r | 1. I am<br>terrified<br>about<br>being<br>overweight | 2. I<br>Avoid<br>eating<br>when<br>I am<br>Hungry | 3. I<br>Find<br>Myself<br>preoccupied<br>with<br>food | 4. I Have<br>gone on<br>eating binges<br>where I feel<br>that I may<br>not be able to<br>stop | 5. I<br>Cut<br>my<br>food<br>into<br>small<br>pieces | 6. I'm<br>aware of<br>the<br>calorie<br>content<br>of foods<br>that I eat | 7. I particularly<br>avoid food with<br>a high<br>carbohydrate<br>content (i.e<br>bread, rice,<br>potatoes etc.) | 8. I feel<br>that<br>other<br>would<br>prefer if<br>I ate<br>more | 9. I<br>vom<br>it<br>after<br>I<br>have<br>eaten | 10. I<br>feel<br>extrem<br>ely<br>guilty<br>after<br>eating | 11. I am<br>preoccu<br>pied<br>with a<br>desire to<br>be<br>thinner | 12. I<br>think<br>about<br>burning<br>up<br>calories<br>when I<br>exercise | 13.<br>Other<br>people<br>think<br>that I<br>am too<br>thin | 14. I am<br>preoccupie<br>d with the<br>thought of<br>having fat<br>on my body | 15. I<br>take<br>longer<br>than<br>others<br>to eat<br>my<br>meals | 16. I<br>avoid<br>foods<br>with<br>sugar<br>in<br>them | 17. I<br>eat<br>die<br>t<br>foo<br>ds | 18. I<br>feel<br>that<br>food<br>contro<br>ls my<br>life | 19. I<br>displa<br>y self-<br>contro<br>l<br>aroun<br>d food | 20. I<br>feel<br>that<br>others<br>pressu<br>re me<br>to eat | 21. I<br>give too<br>much<br>time<br>and<br>thought<br>to food | 22. I<br>feel<br>uncomf<br>ortable<br>after<br>eating<br>sweets | 23. I<br>enga<br>ge in<br>dietin<br>g<br>beha<br>vior | 25. I<br>like<br>my<br>stoma<br>ch to<br>be<br>empty | 25. I<br>enjoy<br>tryin<br>g<br>new<br>rich<br>foods | 26. I<br>have to<br>impuls<br>e to<br>vomit<br>after<br>meals | S<br>c<br>o<br>r<br>e |
|----------------------------|------------------------------------------------------|---------------------------------------------------|-------------------------------------------------------|-----------------------------------------------------------------------------------------------|------------------------------------------------------|---------------------------------------------------------------------------|------------------------------------------------------------------------------------------------------------------|-------------------------------------------------------------------|--------------------------------------------------|-------------------------------------------------------------|---------------------------------------------------------------------|----------------------------------------------------------------------------|-------------------------------------------------------------|--------------------------------------------------------------------------------|--------------------------------------------------------------------|--------------------------------------------------------|---------------------------------------|----------------------------------------------------------|--------------------------------------------------------------|--------------------------------------------------------------|----------------------------------------------------------------|-----------------------------------------------------------------|-------------------------------------------------------|------------------------------------------------------|------------------------------------------------------|---------------------------------------------------------------|-----------------------|
| 1                          | Always                                               | Usuall<br>y                                       | Always                                                | Usually                                                                                       | Alwa<br>ys                                           | Always                                                                    | Usually                                                                                                          | Usually                                                           | Somet<br>imes                                    | Usuall<br>y                                                 | Always                                                              | Always                                                                     | Usuall<br>y                                                 | Always                                                                         | Usually                                                            | Usuall<br>y                                            | Usual<br>ly                           | Alwa<br>ys                                               | Usuall<br>y                                                  | Usuall<br>y                                                  | Always                                                         | Always                                                          | Usual<br>ly                                           | Alwa<br>ys                                           | Rarel<br>y                                           | Usuall<br>y                                                   | 60                    |
| 2                          | Always                                               | Usuall<br>y                                       | Usuall<br>y                                           | Always                                                                                        | Usual<br>ly                                          | Usually                                                                   | Usually                                                                                                          | Usually                                                           | Somet<br>imes                                    | Always                                                      | Always                                                              | Always                                                                     | Someti<br>mes                                               | Always                                                                         | Someti<br>mes                                                      | Usuall<br>y                                            | Usual<br>ly                           | Alwa<br>ys                                               | Alway<br>s                                                   | Alway<br>s                                                   | Always                                                         | Usually                                                         | Usual<br>ly                                           | Usual<br>ly                                          | Usual<br>ly                                          | Usuall<br>y                                                   | 59                    |
| 3                          | Usuall<br>y                                          | Somet<br>imes                                     | Alway<br>s                                            | Always                                                                                        | Alwa<br>ys                                           | Always                                                                    | Always                                                                                                           | Someti<br>mes                                                     | Somet<br>imes                                    | Someti<br>mes                                               | Always                                                              | Always                                                                     | Someti<br>mes                                               | Always                                                                         | Someti<br>mes                                                      | Alway<br>s                                             | Usual<br>ly                           | Usual<br>ly                                              | Usuall<br>y                                                  | Someti<br>mes                                                | Always                                                         | Usually                                                         | Alwa<br>ys                                            | Usual<br>ly                                          | Rarel<br>y                                           | Someti<br>mes                                                 | 53                    |
| 4                          | Always                                               | Usuall<br>y                                       | Alway<br>s                                            | Always                                                                                        | Somet<br>imes                                        | Always                                                                    | Usually                                                                                                          | Never                                                             | Somet<br>imes                                    | Always                                                      | Always                                                              | Always                                                                     | Never                                                       | Always                                                                         | Never                                                              | Usuall<br>y                                            | So me<br>tim<br>es                    | Alwa<br>ys                                               | Never                                                        | Someti<br>mes                                                | Always                                                         | Always                                                          | Alwa<br>ys                                            | Usual<br>ly                                          | Some<br>times                                        | Always                                                        | 52                    |
| 5                          | Alway<br>s                                           | Somet<br>imes                                     | Alway<br>s                                            | Sometimes                                                                                     | Usual<br>ly                                          | Always                                                                    | Usually                                                                                                          | Always                                                            | Nev<br>er                                        | Usuall<br>y                                                 | Always                                                              | Always                                                                     | Always                                                      | Always                                                                         | Always                                                             | Usuall<br>y                                            | So me<br>tim<br>es                    | Alwa<br>ys                                               | Someti<br>mes                                                | Usuall<br>y                                                  | Usually                                                        | Usually                                                         | Usual<br>ly                                           | Usual<br>ly                                          | Neve<br>r                                            | Never                                                         | 52                    |
| 6                          | Someti<br>mes                                        | Somet<br>imes                                     | Alway<br>s                                            | Always                                                                                        | Somet<br>imes                                        | Always                                                                    | Sometimes                                                                                                        | Always                                                            | Somet<br>imes                                    | Usuall<br>y                                                 | Always                                                              | Always                                                                     | Always                                                      | Usually                                                                        | Always                                                             | Alway<br>s                                             | Ne<br>ver                             | Alwa<br>ys                                               | Someti<br>mes                                                | Alway<br>s                                                   | Always                                                         | Usually                                                         | Some<br>times                                         | Somet<br>imes                                        | Neve<br>r                                            | Always                                                        | 53                    |
| 7                          | Alway<br>s                                           | Usuall<br>y                                       | Alway<br>s                                            | Always                                                                                        | Somet<br>imes                                        | Sometim<br>es                                                             | Always                                                                                                           | Someti<br>mes                                                     | Rare<br>ly                                       | Alway<br>s                                                  | Always                                                              | Sometim<br>es                                                              | Never                                                       | Always                                                                         | Always                                                             | Alway<br>s                                             | Alwa<br>ys                            | Alwa<br>ys                                               | Usuall<br>y                                                  | Someti<br>mes                                                | Always                                                         | Always                                                          | Alwa<br>ys                                            | Somet<br>imes                                        | Some<br>times                                        | Someti<br>mes                                                 | 54                    |
| 8                          | Alway<br>s                                           | Somet<br>imes                                     | Alway<br>s                                            | Always                                                                                        | Rarel<br>y                                           | Always                                                                    | Sometimes                                                                                                        | Never                                                             | Rare<br>ly                                       | Usuall<br>y                                                 | Always                                                              | Always                                                                     | Never                                                       | Always                                                                         | Someti<br>mes                                                      | Somet<br>imes                                          | Alwa<br>ys                            | Alwa<br>ys                                               | Usuall<br>y                                                  | Someti<br>mes                                                | Always                                                         | Usually                                                         | Usual<br>ly                                           | Usual<br>ly                                          | Some<br>times                                        | Someti<br>mes                                                 | 47                    |
| 9                          | Alway<br>s                                           | Usuall<br>y                                       | Usuall<br>y                                           | Always                                                                                        | Alwa<br>ys                                           | Sometim<br>es                                                             | Sometimes                                                                                                        | Never                                                             | Usu<br>ally                                      | Usuall<br>y                                                 | Always                                                              | Always                                                                     | Never                                                       | Always                                                                         | Someti<br>mes                                                      | Somet<br>imes                                          | So me<br>tim<br>es                    | Usual<br>ly                                              | Someti<br>mes                                                | Someti<br>mes                                                | Someti<br>mes                                                  | Usually                                                         | Alwa<br>ys                                            | Usual<br>ly                                          | Some<br>times                                        | Always                                                        | 47                    |
| 10                         | Alway<br>s                                           | Alway<br>s                                        | Alway<br>s                                            | Always                                                                                        | Somet<br>imes                                        | Usually                                                                   | Always                                                                                                           | Someti<br>mes                                                     | Rare<br>ly                                       | Alway<br>s                                                  | Always                                                              | Always                                                                     | Never                                                       | Always                                                                         | Someti<br>mes                                                      | Somet<br>imes                                          | So me<br>tim<br>es                    | Somet<br>imes                                            | Someti<br>mes                                                | Someti<br>mes                                                | Usually                                                        | Always                                                          | Alwa<br>ys                                            | Alwa<br>ys                                           | Some<br>times                                        | Someti<br>mes                                                 | 50                    |
| 11                         | Someti<br>mes                                        | Somet<br>imes                                     | Alway<br>s                                            | Rarely                                                                                        | Somet<br>imes                                        | Usually                                                                   | Sometimes                                                                                                        | Always                                                            | Nev<br>er                                        | Usuall<br>y                                                 | Always                                                              | Always                                                                     | Always                                                      | Always                                                                         | Someti<br>mes                                                      | Usuall<br>y                                            | Usual<br>ly                           | Usual<br>ly                                              | Alway<br>s                                                   | Someti<br>mes                                                | Usually                                                        | Usually                                                         | Usual<br>ly                                           | Usual<br>ly                                          | Some<br>times                                        | Never                                                         | 46                    |
| 12                         | Alway<br>s                                           | Somet<br>imes                                     | Alway<br>s                                            | Always                                                                                        | Rarel<br>y                                           | Usually                                                                   | Usually                                                                                                          | Never                                                             | Nev<br>er                                        | Alway<br>s                                                  | Always                                                              | Always                                                                     | Never                                                       | Always                                                                         | Someti<br>mes                                                      | Somet<br>imes                                          | Alwa<br>ys                            | Alwa<br>ys                                               | Rarely                                                       | Never                                                        | Usually                                                        | Always                                                          | Alwa<br>ys                                            | Never                                                | Alwa<br>ys                                           | Never                                                         | 45                    |
| 13                         | Alway<br>s                                           | Usuall<br>y                                       | Alway<br>s                                            | Always                                                                                        | Usual<br>ly                                          | Sometim<br>es                                                             | Sometimes                                                                                                        | Someti<br>mes                                                     | Nev<br>er                                        | Usuall<br>y                                                 | Always                                                              | Always                                                                     | Rarely                                                      | Always                                                                         | Rarely                                                             | Somet<br>imes                                          | So me<br>tim<br>es                    | Usual<br>ly                                              | Someti<br>mes                                                | Someti<br>mes                                                | Always                                                         | Usually                                                         | Usual<br>ly                                           | Rarel<br>y                                           | Alwa<br>ys                                           | Rarely                                                        | 43                    |
| 14                         | Alway<br>s                                           | Somet<br>imes                                     | Alway<br>s                                            | Sometimes                                                                                     | Alwa<br>ys                                           | Sometim<br>es                                                             | Always                                                                                                           | Always                                                            | Nev<br>er                                        | Someti<br>mes                                               | Always                                                              | Sometim<br>es                                                              | Someti<br>mes                                               | Always                                                                         | Always                                                             | Somet<br>imes                                          | Ne<br>ver                             | Alwa<br>ys                                               | Someti<br>mes                                                | Alway<br>s                                                   | Someti<br>mes                                                  | Someti<br>mes                                                   | Alwa<br>ys                                            | Rarel<br>y                                           | Neve<br>r                                            | Never                                                         | 43                    |
| 15                         | Usuall<br>y                                          | Somet<br>imes                                     | Alway<br>s                                            | Sometimes                                                                                     | Alwa<br>ys                                           | Sometim<br>es                                                             | Sometimes                                                                                                        | Someti<br>mes                                                     | Rare<br>ly                                       | Someti<br>mes                                               | Usually                                                             | Usually                                                                    | Never                                                       | Always                                                                         | Someti<br>mes                                                      | Usuall<br>y                                            | Ne<br>ver                             | Usual<br>ly                                              | Usuall<br>y                                                  | Alway<br>s                                                   | Always                                                         | Someti<br>mes                                                   | Alwa<br>ys                                            | Usual<br>ly                                          | Rarel<br>y                                           | Rarely                                                        | 40                    |
| 16                         | Usuall<br>y                                          | Somet<br>imes                                     | Alway<br>s                                            | Always                                                                                        | Somet<br>imes                                        | Never                                                                     | Sometimes                                                                                                        | Never                                                             | Usu<br>ally                                      | Alway<br>s                                                  | Always                                                              | Always                                                                     | Someti<br>mes                                               | Always                                                                         | Rarely                                                             | Somet<br>imes                                          | So me<br>tim<br>es                    | Somet<br>imes                                            | Never                                                        | Never                                                        | Someti<br>mes                                                  | Usually                                                         | Usual<br>ly                                           | Somet<br>imes                                        | Neve<br>r                                            | Always                                                        | 38                    |
| 17                         | Alway<br>s                                           | Rarely                                            | Alway<br>s                                            | Sometimes                                                                                     | Usual<br>ly                                          | Usually                                                                   | Rarely                                                                                                           | Someti<br>mes                                                     | Nev<br>er                                        | Someti<br>mes                                               | Always                                                              | Always                                                                     | Someti<br>mes                                               | Always                                                                         | Always                                                             | Never                                                  | So me<br>tim<br>es                    | Usual<br>ly                                              | Someti<br>mes                                                | Rarely                                                       | Usually                                                        | Never                                                           | Alwa<br>ys                                            | Usual<br>ly                                          | Usual<br>ly                                          | Rarely                                                        | 39                    |
| 18                         | Alway<br>s                                           | Somet<br>imes                                     | Alway<br>s                                            | Always                                                                                        | Usual<br>ly                                          | Usually                                                                   | Sometimes                                                                                                        | Never                                                             | Rare<br>ly                                       | Alway<br>s                                                  | Always                                                              | Always                                                                     | Never                                                       | Always                                                                         | Never                                                              | Rarely                                                 | So me<br>tim<br>es                    | Usual<br>ly                                              | Rarely                                                       | Never                                                        | Always                                                         | Someti<br>mes                                                   | Alwa<br>ys                                            | Somet<br>imes                                        | Usual<br>ly                                          | Rarely                                                        | 40                    |

|    |         |           |           |           |           |           |           |           |           |           |           |           |           |           |           |           |           |           |           |           |           |           |           |           |           |           |    |
|----|---------|-----------|-----------|-----------|-----------|-----------|-----------|-----------|-----------|-----------|-----------|-----------|-----------|-----------|-----------|-----------|-----------|-----------|-----------|-----------|-----------|-----------|-----------|-----------|-----------|-----------|----|
| 19 | Never   | Usually   | Always    | Never     | Always    | Always    | Never     | Always    | Never     | Never     | Never     | Never     | Always    | Never     | Always    | Rarely    | Sometimes | Always    | Sometimes | Always    | Always    | Usually   | Never     | Usually   | Usually   | Sometimes | 38 |
| 20 | Usually | Sometimes | Sometimes | Always    | Always    | Sometimes | Sometimes | Always    | Never     | Always    | Always    | Always    | Never     | Always    | Sometimes | Rarely    | Sometimes | Sometimes | Never     | Sometimes | Sometimes | Sometimes | Usually   | Usually   | Sometimes | Never     | 38 |
| 21 | Always  | Sometimes | Always    | Always    | Always    | Never     | Sometimes | Never     | Sometimes | Always    | Always    | Always    | Never     | Usually   | Never     | Sometimes | Usually   | Always    | Sometimes | Rarely    | Usually   | Usually   | Always    | Usually   | Sometimes | Sometimes | 44 |
| 22 | Usually | Sometimes | Usually   | Sometimes | Sometimes | Always    | Sometimes | Usually   | Never     | Sometimes | Sometimes | Usually   | Always    | Always    | Usually   | Usually   | Usually   | Always    | Usually   | Always    | Sometimes | Usually   | Never     | Never     | Sometimes | Never     | 41 |
| 23 | Always  | Usually   | Always    | Always    | Never     | Sometimes | Sometimes | Never     | Never     | Always    | Always    | Usually   | Never     | Always    | Always    | Sometimes | Sometimes | Always    | Sometimes | Never     | Sometimes | Sometimes | Sometimes | Rarely    | Sometimes | Never     | 37 |
| 24 | Always  | Sometimes | Always    | Usually   | Sometimes | Always    | Usually   | Never     | Never     | Usually   | Always    | Always    | Never     | Always    | Rarely    | Usually   | Sometimes | Usually   | Usually   | Sometimes | Sometimes | Usually   | Sometimes | Never     | Never     | Never     | 38 |
| 25 | Always  | Usually   | Sometimes | Usually   | Sometimes | Sometimes | Usually   | Sometimes | Never     | Always    | Always    | Usually   | Never     | Always    | Sometimes | Sometimes | Rarely    | Sometimes | Sometimes | Rarely    | Usually   | Sometimes | Always    | Usually   | Always    | Never     | 39 |
| 26 | Always  | Sometimes | Usually   | Usually   | Never     | Usually   | Never     | Sometimes | Rarely    | Usually   | Always    | Always    | Never     | Always    | Rarely    | Usually   | Usually   | Sometimes | Sometimes | Rarely    | Usually   | Usually   | Usually   | Usually   | Sometimes | Sometimes | 37 |
| 27 | Usually | Never     | Always    | Usually   | Usually   | Always    | Never     | Usually   | Never     | Sometimes | Never     | Always    | Sometimes | Always    | Never     | Always    | Never     | Always    | Sometimes | Usually   | Usually   | Usually   | Never     | Never     | Usually   | Never     | 37 |
| 28 | Always  | Sometimes | Always    | Always    | Sometimes | Usually   | Sometimes | Sometimes | Never     | Always    | Usually   | Always    | Rarely    | Sometimes | Sometimes | Sometimes | Sometimes | Usually   | Rarely    | Sometimes | Always    | Usually   | Always    | Sometimes | Rarely    | Never     | 39 |
| 29 | Usually | Sometimes | Sometimes | Usually   | Never     | Usually   | Sometimes | Always    | Sometimes | Usually   | Usually   | Always    | Always    | Always    | Sometimes | Never     | Never     | Sometimes | Always    | Always    | Rarely    | Sometimes | Sometimes | Never     | Usually   | Usually   | 40 |
| 30 | Usually | Sometimes | Always    | Always    | Sometimes | Never     | Sometimes | Sometimes | Sometimes | Always    | Always    | Usually   | Rarely    | Always    | Rarely    | Rarely    | Rarely    | Always    | Rarely    | Usually   | Always    | Usually   | Always    | Sometimes | Usually   | Sometimes | 41 |
| 31 | Usually | Rarely    | Always    | Sometimes | Sometimes | Sometimes | Usually   | Sometimes | Never     | Sometimes | Always    | Always    | Rarely    | Always    | Usually   | Usually   | Sometimes | Sometimes | Usually   | Rarely    | Usually   | Sometimes | Usually   | Sometimes | Always    | Never     | 38 |
| 32 | Always  | Sometimes | Always    | Rarely    | Sometimes | Usually   | Sometimes | Always    | Never     | Rarely    | Usually   | Always    | Usually   | Usually   | Sometimes | Sometimes | Sometimes | Always    | Usually   | Usually   | Usually   | Sometimes | Sometimes | Rarely    | Rarely    | Never     | 37 |
| 33 | Always  | Sometimes | Usually   | Usually   | Usually   | Sometimes | Usually   | Usually   | Never     | Usually   | Always    | Always    | Usually   | Always    | Sometimes | Sometimes | Never     | Sometimes | Usually   | Sometimes | Sometimes | Sometimes | Usually   | Rarely    | Rarely    | Rarely    | 38 |
| 34 | Always  | Sometimes | Always    | Always    | Sometimes | Sometimes | Rarely    | Usually   | Never     | Always    | Always    | Always    | Never     | Always    | Rarely    | Sometimes | Sometimes | Sometimes | Always    | Sometimes | Sometimes | Sometimes | Always    | Sometimes | Sometimes | Sometimes | 41 |
| 35 | Usually | Sometimes | Always    | Usually   | Rarely    | Rarely    | Sometimes | Usually   | Rarely    | Usually   | Sometimes | Always    | Usually   | Usually   | Always    | Sometimes | Never     | Always    | Sometimes | Usually   | Always    | Sometimes | Sometimes | Never     | Sometimes | Rarely    | 37 |
| 36 | Always  | Never     | Always    | Always    | Always    | Never     | Never     | Never     | Never     | Always    | Always    | Never     | Never     | Always    | Sometimes | Never     | Never     | Always    | Never     | Never     | Always    | Rarely    | Always    | Never     | Always    | Never     | 34 |
| 37 | Usually | Rarely    | Always    | Sometimes | Rarely    | Usually   | Usually   | Never     | Never     | Usually   | Always    | Always    | Never     | Always    | Never     | Sometimes | Sometimes | Sometimes | Sometimes | Always    | Usually   | Sometimes | Usually   | Sometimes | Sometimes | Never     | 35 |
| 38 | Always  | Sometimes | Always    | Always    | Never     | Sometimes | Never     | Sometimes | Never     | Sometimes | Always    | Always    | Never     | Always    | Never     | Never     | Never     | Always    | Sometimes | Never     | Always    | Never     | Sometimes | Never     | Always    | Sometimes | 34 |
| 39 | Usually | Never     | Always    | Always    | Always    | Always    | Sometimes | Usually   | Never     | Never     | Never     | Always    | Always    | Never     | Rarely    | Always    | Never     | Sometimes | Always    | Sometimes | Usually   | Rarely    | Never     | Sometimes | Never     | Never     | 34 |
| 40 | Always  | Never     | Always    | Sometimes | Rarely    | Rarely    | Sometimes | Rarely    | Never     | Sometimes | Sometimes | Sometimes | Sometimes | Usually   | Rarely    | Sometimes | 34 |
| 41 | Always  | Usually   | Always    | Always    | Always    | Sometimes | Sometimes | Never     | Never     | Sometimes | Sometimes | Sometimes | Never     | Always    | Never     | Usually   | Never     | Always    | Sometimes | Never     | Sometimes | Never     | Always    | Never     | Sometimes | Never     | 33 |
| 42 | Always  | Rarely    | Usually   | Always    | Never     | Sometimes | Never     | Never     | Usually   | Always    | Always    | Sometimes | Never     | Usually   | Never     | Never     | Never     | Always    | Never     | Never     | Always    | Always    | Rarely    | Never     | Sometimes | Always    | 33 |

|    |           |           |           |           |           |           |           |           |           |           |           |           |           |           |           |           |           |           |           |           |           |           |           |           |           |           |    |
|----|-----------|-----------|-----------|-----------|-----------|-----------|-----------|-----------|-----------|-----------|-----------|-----------|-----------|-----------|-----------|-----------|-----------|-----------|-----------|-----------|-----------|-----------|-----------|-----------|-----------|-----------|----|
| 43 | Sometimes | Never     | Always    | Rarely    | Sometimes | Sometimes | Never     | Always    | Sometimes | Rarely    | Sometimes | Sometimes | Sometimes | Sometimes | Sometimes | Always    | Sometimes | Usually   | Always    | Always    | Sometimes | Rarely    | Sometimes | Never     | Always    | Sometimes | 33 |
| 44 | Usually   | Usually   | Usually   | Sometimes | Always    | Sometimes | Sometimes | Never     | Rarely    | Usually   | Always    | Always    | Sometimes | Usually   | Sometimes | Sometimes | Never     | Never     | Sometimes | Never     | Sometimes | Always    | Usually   | Sometimes | Never     | Usually   | 35 |
| 45 | Usually   | Usually   | Usually   | Sometimes | Usually   | Sometimes | Sometimes | Always    | Sometimes | Always    | Sometimes | Always    | Sometimes | Sometimes | Always    | Sometimes | Sometimes | Usually   | Sometimes | Sometimes | Sometimes | Usually   | Sometimes | Rarely    | Sometimes | Sometimes | 39 |
| 46 | Always    | Sometimes | Always    | Always    | Always    | Sometimes | Sometimes | Rarely    | Never     | Always    | Always    | Always    | Never     | Always    | Always    | Sometimes | Rarely    | Usually   | Sometimes | Sometimes | Sometimes | Sometimes | Rarely    | Never     | Sometimes | Never     | 38 |
| 47 | Rarely    | Usually   | Always    | Never     | Always    | Usually   | Sometimes | Sometimes | Never     | Never     | Never     | Sometimes | Usually   | Always    | Always    | Usually   | Never     | Never     | Always    | Sometimes | Rarely    | Usually   | Never     | Always    | Rarely    | Never     | 32 |
| 48 | Always    | Sometimes | Sometimes | Usually   | Usually   | Usually   | Sometimes | Rarely    | Never     | Usually   | Always    | Always    | Never     | Always    | Usually   | Rarely    | Rarely    | Sometimes | Rarely    | Never     | Usually   | Sometimes | Sometimes | Sometimes | Sometimes | Sometimes | 33 |
| 49 | Always    | Never     | Always    | Never     | Always    | Always    | Usually   | Sometimes | Never     | Rarely    | Sometimes | Always    | Rarely    | Sometimes | Usually   | Always    | Never     | Rarely    | Always    | Sometimes | Sometimes | Usually   | Sometimes | Rarely    | Rarely    | Never     | 33 |
| 50 | Always    | Usually   | Always    | Rarely    | Never     | Sometimes | Sometimes | Sometimes | Never     | Sometimes | Usually   | Usually   | Rarely    | Always    | Sometimes | Usually   | Rarely    | Always    | Usually   | Sometimes | Rarely    | Always    | Sometimes | Rarely    | Sometimes | Never     | 33 |
| 51 | Usually   | Sometimes | Sometimes | Always    | Sometimes | Sometimes | Sometimes | Never     | Rarely    | Sometimes | Sometimes | Always    | Never     | Always    | Sometimes | Usually   | Rarely    | Sometimes | Sometimes | Sometimes | Usually   | Usually   | Always    | Usually   | Sometimes | Rarely    | 34 |
| 52 | Always    | Rarely    | Always    | Never     | Always    | Usually   | Sometimes | Never     | Never     | Rarely    | Always    | Sometimes | Never     | Always    | Usually   | Sometimes | Never     | Usually   | Usually   | Never     | Never     | Sometimes | Usually   | Usually   | Rarely    | Never     | 31 |
| 53 | Always    | Never     | Usually   | Usually   | Sometimes | Sometimes | Sometimes | Never     | Never     | Usually   | Always    | Usually   | Never     | Usually   | Never     | Never     | Sometimes | Sometimes | Sometimes | Always    | Sometimes | Usually   | Usually   | Sometimes | Rarely    | Rarely    | 32 |
| 54 | Usually   | Never     | Always    | Sometimes | Always    | Usually   | Sometimes | Never     | Never     | Usually   | Sometimes | Always    | Never     | Always    | Usually   | Usually   | Sometimes | Usually   | Sometimes | Rarely    | Sometimes | Sometimes | Sometimes | Never     | Rarely    | Rarely    | 32 |
| 55 | Sometimes | Sometimes | Usually   | Rarely    | Rarely    | Rarely    | Rarely    | Always    | Sometimes | Sometimes | Always    | Sometimes | Always    | Always    | Usually   | Rarely    | Rarely    | Usually   | Sometimes | Usually   | Rarely    | Sometimes | Sometimes | Usually   | Rarely    | Sometimes | 31 |
| 56 | Always    | Never     | Always    | Never     | Never     | Always    | Always    | Sometimes | Never     | Rarely    | Always    | Always    | Sometimes | Always    | Never     | Sometimes | Sometimes | Never     | Usually   | Sometimes | Sometimes | Sometimes | Usually   | Rarely    | Sometimes | Never     | 33 |
| 57 | Always    | Never     | Always    | Usually   | Always    | Sometimes | Rarely    | Rarely    | Never     | Usually   | Always    | Rarely    | Never     | Usually   | Rarely    | Sometimes | Usually   | Always    | Sometimes | Rarely    | Usually   | Usually   | Sometimes | Never     | Rarely    | Never     | 31 |
| 58 | Always    | Rarely    | Usually   | Always    | Sometimes | Usually   | Never     | Never     | Never     | Usually   | Always    | Sometimes | Never     | Always    | Rarely    | Rarely    | Never     | Always    | Rarely    | Never     | Always    | Always    | Sometimes | Never     | Rarely    | Never     | 30 |
| 59 | Always    | Sometimes | Always    | Always    | Sometimes | Sometimes | Sometimes | Never     | Never     | Always    | Always    | Sometimes | Never     | Usually   | Rarely    | Rarely    | Never     | Usually   | Rarely    | Never     | Usually   | Rarely    | Always    | Rarely    | Usually   | Rarely    | 31 |
| 60 | Always    | Usually   | Always    | Sometimes | Rarely    | Sometimes | Never     | Sometimes | Never     | Sometimes | Always    | Sometimes | Rarely    | Always    | Sometimes | Sometimes | Rarely    | Usually   | Usually   | Usually   | Usually   | Sometimes | Sometimes | Never     | Rarely    | Never     | 31 |
| 61 | Always    | Sometimes | Always    | Sometimes | Sometimes | Always    | Rarely    | Rarely    | Never     | Usually   | Always    | Usually   | Sometimes | Always    | Sometimes | Never     | Never     | Usually   | Sometimes | Never     | Sometimes | Sometimes | Sometimes | Never     | Rarely    | Never     | 30 |
| 62 | Always    | Never     | Always    | Never     | Never     | Always    | Never     | Never     | Never     | Never     | Always    | Always    | Never     | Always    | Never     | Sometimes | Never     | Always    | Usually   | Never     | Never     | Sometimes | Always    | Never     | Sometimes | Never     | 29 |
| 63 | Always    | Sometimes | Usually   | Sometimes | Rarely    | Sometimes | Sometimes | Sometimes | Never     | Sometimes | Always    | Always    | Sometimes | Always    | Always    | Rarely    | Never     | Sometimes | Sometimes | Sometimes | Sometimes | Sometimes | Usually   | Sometimes | Usually   | Rarely    | 34 |
| 64 | Always    | Usually   | Always    | Usually   | Usually   | Sometimes | Rarely    | Usually   | Never     | Usually   | Usually   | Sometimes | Rarely    | Usually   | Sometimes | Usually   | Never     | Sometimes | Rarely    | Always    | Sometimes | Sometimes | Sometimes | Sometimes | Rarely    | Never     | 33 |
| 65 | Sometimes | Never     | Usually   | Never     | Never     | Always    | Sometimes | Sometimes | Never     | Sometimes | Always    | Always    | Never     | Always    | Never     | Usually   | Never     | Never     | Always    | Never     | Never     | Always    | Usually   | Sometimes | Rarely    | Rarely    | 29 |
| 66 | Always    | Sometimes | Always    | Usually   | Usually   | Sometimes | Sometimes | Usually   | Never     | Rarely    | Sometimes | Rarely    | Sometimes | Usually   | Always    | Sometimes | Sometimes | Sometimes | Usually   | Sometimes | Sometimes | Usually   | Sometimes | Sometimes | Sometimes | Never     | 35 |
| 67 | Always    | Sometimes | Sometimes | Never     | Always    | Never     | Never     | Sometimes | Never     | Sometimes | Rarely    | Never     | Always    | Always    | Usually   | Usually   | Sometimes | Usually   | Sometimes | Sometimes | Usually   | Always    | Rarely    | Usually   | Never     | Rarely    | 32 |
| 68 | Always    | Never     | Never     | Always    | Usually   | Rarely    | Never     | Never     | Never     | Always    | Always    | Never     | Never     | Sometimes | Rarely    | Rarely    | Never     | Always    | Rarely    | Never     | Always    | Always    | Usually   | Never     | Usually   | Never     | 28 |

|    |           |           |           |           |           |           |           |           |        |           |           |           |           |           |           |           |           |           |           |           |           |           |           |           |           |           |       |    |
|----|-----------|-----------|-----------|-----------|-----------|-----------|-----------|-----------|--------|-----------|-----------|-----------|-----------|-----------|-----------|-----------|-----------|-----------|-----------|-----------|-----------|-----------|-----------|-----------|-----------|-----------|-------|----|
| 69 | Usually   | Sometimes | Always    | Usually   | Sometimes | Rarely    | Sometimes | Rarely    | Never  | Usually   | Never     | Always    | Never     | Always    | Usually   | Usually   | Never     | Sometimes | Sometimes | Rarely    | Sometimes | Sometimes | Usually   | Sometimes | Sometimes | Never     | 30    |    |
| 70 | Always    | Sometimes | Always    | Never     | Always    | Usually   | Sometimes | Never     | Never  | Sometimes | Always    | Never     | Sometimes | Sometimes | Usually   | Usually   | Usually   | Rarely    | Usually   | Never     | Sometimes | Rarely    | Sometimes | Rarely    | Never     | 29        |       |    |
| 71 | Always    | Usually   | Usually   | Sometimes | Sometimes | Sometimes | Sometimes | Rarely    | Rarely | Sometimes | Usually   | Usually   | Never     | Usually   | Sometimes | Usually   | Sometimes | Sometimes | Sometimes | Sometimes | Sometimes | Usually   | Sometimes | Sometimes | Never     | 31        |       |    |
| 72 | Always    | Never     | Always    | Always    | Never     | Never     | Rarely    | Sometimes | Never  | Always    | Always    | Always    | Never     | Always    | Sometimes | Rarely    | Never     | Always    | Rarely    | Never     | Usually   | Sometimes | Rarely    | Never     | Sometimes | Never     | 30    |    |
| 73 | Usually   | Rarely    | Usually   | Sometimes | Sometimes | Sometimes | Sometimes | Rarely    | Never  | Sometimes | Usually   | Sometimes | Sometimes | Usually   | Usually   | Always    | Sometimes | Rarely    | Usually   | Sometimes | Sometimes | Always    | Sometimes | Rarely    | Sometimes | 31        |       |    |
| 74 | Always    | Sometimes | Always    | Always    | Never     | Never     | Sometimes | Rarely    | Never  | Sometimes | Always    | Sometimes | Never     | Always    | Sometimes | Never     | Sometimes | Never     | Sometimes | Sometimes | Usually   | Sometimes | Sometimes | Usually   | Sometimes | 31        |       |    |
| 75 | Usually   | Rarely    | Usually   | Usually   | Rarely    | Sometimes | Sometimes | Sometimes | Never  | Sometimes | Usually   | Always    | Sometimes | Usually   | Always    | Rarely    | Sometimes | Sometimes | Sometimes | Sometimes | Usually   | Rarely    | Usually   | Never     | Sometimes | Never     | 30    |    |
| 76 | Sometimes | Sometimes | Always    | Sometimes | Usually   | Sometimes | Usually   | Usually   | Rarely | Rarely    | Sometimes | Sometimes | Never     | Sometimes | Rarely    | Usually   | Sometimes | Sometimes | Usually   | Sometimes | Usually   | Sometimes | Usually   | Sometimes | Sometimes | Never     | 30    |    |
| 77 | Always    | Never     | Usually   | Usually   | Usually   | Usually   | Sometimes | Never     | Never  | Rarely    | Always    | Sometimes | Never     | Sometimes | Usually   | Never     | Sometimes | Never     | Usually   | Usually   | Sometimes | Rarely    | Never     | Never     | Usually   | Never     | 27    |    |
| 78 | Always    | Never     | Always    | Sometimes | Usually   | Sometimes | Sometimes | Never     | Never  | Rarely    | Always    | Usually   | Never     | Usually   | Never     | Sometimes | Sometimes | Sometimes | Usually   | Never     | Usually   | Rarely    | Always    | Never     | Sometimes | Never     | 29    |    |
| 79 | Always    | Sometimes | Always    | Sometimes | Usually   | Usually   | Usually   | Sometimes | Never  | Rarely    | Sometimes | Usually   | Rarely    | Usually   | Usually   | Sometimes | Rarely    | Rarely    | Usually   | Rarely    | Rarely    | Sometimes | Usually   | Rarely    | Rarely    | Never     | 28    |    |
| 80 | Always    | Sometimes | Always    | Sometimes | Always    | Never     | Sometimes | Never     | Never  | Never     | Sometimes | Always    | Never     | Sometimes | Never     | Sometimes | Never     | Never     | Always    | Never     | Never     | Sometimes | Usually   | Never     | Sometimes | Never     | 25    |    |
| 81 | Usually   | Sometimes | Always    | Sometimes | Usually   | Rarely    | Sometimes | Rarely    | Never  | Usually   | Always    | Sometimes | Never     | Sometimes | Always    | Sometimes | Never     | Usually   | Sometimes | Sometimes | Always    | Sometimes | Sometimes | Sometimes | Sometimes | Sometimes | 33    |    |
| 82 | Always    | Rarely    | Sometimes | Usually   | Sometimes | Sometimes | Sometimes | Usually   | Never  | Sometimes | Always    | Usually   | Never     | Sometimes | Sometimes | Sometimes | Rarely    | Always    | Rarely    | Sometimes | Usually   | Sometimes | Sometimes | Rarely    | Rarely    | 29        |       |    |
| 83 | Always    | Sometimes | Sometimes | Never     | Sometimes | Sometimes | Sometimes | Sometimes | Never  | Sometimes | Sometimes | Usually   | Sometimes | Always    | Sometimes | Sometimes | Sometimes | Sometimes | Always    | Sometimes | Sometimes | Sometimes | Sometimes | Sometimes | Never     | Sometimes | Never | 29 |
| 84 | Usually   | Never     | Always    | Sometimes | Sometimes | Usually   | Usually   | Always    | Never  | Never     | Sometimes | Sometimes | Rarely    | Always    | Usually   | Usually   | Never     | Never     | Usually   | Rarely    | Sometimes | Rarely    | Rarely    | Rarely    | Never     | Never     | 26    |    |
| 85 | Usually   | Never     | Usually   | Usually   | Sometimes | Sometimes | Usually   | Never     | Never  | Sometimes | Usually   | Sometimes | Never     | Sometimes | Never     | Usually   | Sometimes | Sometimes | Sometimes | Sometimes | Sometimes | Usually   | Usually   | Never     | Sometimes | Never     | 27    |    |
| 86 | Never     | Never     | Always    | Never     | Always    | Never     | Never     | Always    | Never  | Never     | Never     | Never     | Always    | Never     | Never     | Never     | Never     | Always    | Always    | Always    | Sometimes | Never     | Never     | Never     | Usually   | Sometimes | 25    |    |
| 87 | Sometimes | Never     | Always    | Sometimes | Sometimes | Usually   | Never     | Sometimes | Never  | Never     | Never     | Sometimes | Rarely    | Sometimes | Always    | Always    | Usually   | Always    | Always    | Never     | Usually   | Sometimes | Never     | Never     | Sometimes | Never     | 29    |    |
| 88 | Usually   | Sometimes | Usually   | Sometimes | Sometimes | Sometimes | Sometimes | Never     | Never  | Sometimes | Usually   | Always    | Rarely    | Usually   | Usually   | Sometimes | Rarely    | Usually   | Sometimes | Never     | Usually   | Never     | Rarely    | Never     | Sometimes | Never     | 26    |    |
| 89 | Usually   | Sometimes | Usually   | Sometimes | Sometimes | Always    | Sometimes | Rarely    | Never  | Sometimes | Usually   | Usually   | Rarely    | Usually   | Sometimes | Usually   | Sometimes | Sometimes | Rarely    | Sometimes | Sometimes | Usually   | Sometimes | Sometimes | Rarely    | 30        |       |    |
| 90 | Usually   | Rarely    | Sometimes | Always    | Usually   | Sometimes | Sometimes | Sometimes | Never  | Sometimes | Usually   | Never     | Never     | Sometimes | Always    | Rarely    | Rarely    | Always    | Rarely    | Never     | Sometimes | Never     | Sometimes | Always    | Never     | 27        |       |    |
| 91 | Sometimes | Always    | Always    | Never     | Always    | Sometimes | Sometimes | Sometimes | Never  | Sometimes | Rarely    | Sometimes | Sometimes | Rarely    | Usually   | Sometimes | Never     | Never     | Always    | Sometimes | Never     | Never     | Never     | Never     | Rarely    | Never     | 24    |    |
| 92 | Always    | Never     | Always    | Always    | Rarely    | Rarely    | Rarely    | Never     | Never  | Always    | Always    | Always    | Never     | Usually   | Sometimes | Rarely    | Never     | Sometimes | Sometimes | Rarely    | Sometimes | Sometimes | Sometimes | Sometimes | Never     | Sometimes | Never | 27 |

|     |           |           |           |           |           |           |           |           |        |           |           |           |           |           |           |           |           |           |           |           |           |           |           |           |           |           |    |
|-----|-----------|-----------|-----------|-----------|-----------|-----------|-----------|-----------|--------|-----------|-----------|-----------|-----------|-----------|-----------|-----------|-----------|-----------|-----------|-----------|-----------|-----------|-----------|-----------|-----------|-----------|----|
| 93  | Usually   | Rarely    | Always    | Rarely    | Sometimes | Usually   | Usually   | Rarely    | Never  | Sometimes | Always    | Usually   | Never     | Sometimes | Rarely    | Sometimes | Sometimes | Sometimes | Usually   | Never     | Sometimes | Sometimes | Always    | Rarely    | Rarely    | Never     | 27 |
| 94  | Sometimes | Rarely    | Usually   | Usually   | Never     | Never     | Sometimes | Rarely    | Rarely | Sometimes | Usually   | Always    | Never     | Sometimes | Never     | Usually   | Rarely    | Never     | Usually   | Never     | Usually   | Sometimes | Usually   | Rarely    | Sometimes | Usually   | 25 |
| 95  | Always    | Never     | Always    | Rarely    | Usually   | Always    | Sometimes | Usually   | Never  | Never     | Sometimes | Sometimes | Sometimes | Usually   | Rarely    | Sometimes | Rarely    | Usually   | Usually   | Rarely    | Usually   | Sometimes | Rarely    | Sometimes | Never     | Never     | 28 |
| 96  | Never     | Sometimes | Always    | Always    | Rarely    | Never     | Never     | Sometimes | Rarely | Sometimes | Never     | Sometimes | Always    | Sometimes | Sometimes | Sometimes | Rarely    | Usually   | Usually   | Sometimes | Sometimes | Sometimes | Never     | Never     | Usually   | Sometimes | 26 |
| 97  | Always    | Sometimes | Always    | Never     | Usually   | Rarely    | Usually   | Never     | Never  | Never     | Always    | Sometimes | Never     | Sometimes | Always    | Usually   | Never     | Never     | Usually   | Never     | Never     | Never     | Rarely    | Never     | Usually   | Never     | 25 |
| 98  | Usually   | Never     | Always    | Sometimes | Sometimes | Usually   | Rarely    | Sometimes | Never  | Rarely    | Rarely    | Always    | Sometimes | Sometimes | Rarely    | Usually   | Sometimes | Always    | Sometimes | Sometimes | Sometimes | Sometimes | Sometimes | Rarely    | Sometimes | Never     | 27 |
| 99  | Usually   | Rarely    | Always    | Sometimes | Never     | Rarely    | Rarely    | Usually   | Never  | Sometimes | Usually   | Usually   | Sometimes | Usually   | Usually   | Rarely    | Rarely    | Usually   | Sometimes | Sometimes | Sometimes | Sometimes | Sometimes | Sometimes | Usually   | Never     | 28 |
| 100 | Always    | Sometimes | Always    | Sometimes | Always    | Usually   | Never     | Never     | Never  | Never     | Always    | Always    | Never     | Usually   | Sometimes | Sometimes | Rarely    | Rarely    | Usually   | Never     | Sometimes | Never     | Sometimes | Never     | Rarely    | Never     | 27 |
| 101 | Usually   | Rarely    | Always    | Sometimes | Sometimes | Sometimes | Usually   | Sometimes | Never  | Rarely    | Usually   | Always    | Never     | Usually   | Sometimes | Usually   | Usually   | Sometimes | Usually   | Sometimes | Usually   | Rarely    | Sometimes | Never     | Sometimes | Rarely    | 31 |
| 102 | Usually   | Never     | Always    | Sometimes | Sometimes | Usually   | Usually   | Never     | Never  | Rarely    | Sometimes | Rarely    | Sometimes | Sometimes | Always    | Sometimes | Rarely    | Sometimes | Usually   | Never     | Always    | Usually   | Sometimes | Never     | Rarely    | Never     | 27 |
| 103 | Usually   | Rarely    | Always    | Usually   | Sometimes | Usually   | Never     | Rarely    | Never  | Sometimes | Sometimes | Sometimes | Sometimes | Usually   | Never     | Rarely    | Rarely    | Sometimes | Sometimes | Usually   | Usually   | Usually   | Rarely    | Rarely    | Sometimes | Never     | 25 |
| 104 | Always    | Rarely    | Usually   | Usually   | Never     | Sometimes | Sometimes | Never     | Never  | Usually   | Always    | Always    | Never     | Always    | Sometimes | Sometimes | Rarely    | Usually   | Rarely    | Never     | Usually   | Sometimes | Rarely    | Never     | Sometimes | Rarely    | 28 |
| 105 | Usually   | Sometimes | Sometimes | Rarely    | Never     | Sometimes | Usually   | Never     | Never  | Usually   | Always    | Always    | Never     | Usually   | Never     | Sometimes | Rarely    | Sometimes | Usually   | Never     | Sometimes | Sometimes | Sometimes | Rarely    | Rarely    | Never     | 24 |
| 106 | Usually   | Sometimes | Always    | Usually   | Never     | Never     | Rarely    | Sometimes | Never  | Usually   | Always    | Sometimes | Usually   | Sometimes | Sometimes | Never     | Sometimes | Sometimes | Rarely    | Rarely    | Sometimes | Never     | Rarely    | Sometimes | Always    | Sometimes | 27 |
| 107 | Usually   | Rarely    | Always    | Sometimes | Always    | Sometimes | Sometimes | Rarely    | Never  | Sometimes | Usually   | Sometimes | Never     | Usually   | Sometimes | Usually   | Usually   | Sometimes | Sometimes | Never     | Sometimes | Sometimes | Never     | Never     | Rarely    | Never     | 26 |
| 108 | Always    | Never     | Usually   | Sometimes | Sometimes | Usually   | Sometimes | Sometimes | Never  | Rarely    | Sometimes | Usually   | Sometimes | Usually   | Never     | Usually   | Sometimes | Rarely    | Sometimes | Never     | Usually   | Usually   | Never     | Sometimes | Sometimes | Never     | 27 |
| 109 | Usually   | Rarely    | Always    | Always    | Sometimes | Sometimes | Sometimes | Sometimes | Never  | Sometimes | Usually   | Sometimes | Sometimes | Usually   | Rarely    | Sometimes | Rarely    | Usually   | Rarely    | Rarely    | Usually   | Rarely    | Never     | Sometimes | Sometimes | Never     | 26 |
| 110 | Always    | Rarely    | Always    | Never     | Usually   | Usually   | Usually   | Never     | Never  | Sometimes | Sometimes | Rarely    | Rarely    | Sometimes | Rarely    | Always    | Usually   | Sometimes | Sometimes | Never     | Never     | Usually   | Sometimes | Never     | Sometimes | Never     | 26 |
| 111 | Sometimes | Rarely    | Always    | Sometimes | Always    | Never     | Never     | Always    | Never  | Usually   | Rarely    | Never     | Usually   | Rarely    | Rarely    | Never     | Never     | Always    | Sometimes | Always    | Usually   | Sometimes | Never     | Never     | Sometimes | Never     | 26 |
| 112 | Always    | Rarely    | Usually   | Sometimes | Usually   | Never     | Sometimes | Never     | Never  | Sometimes | Sometimes | Usually   | Sometimes | Rarely    | Usually   | Sometimes | Sometimes | Sometimes | Usually   | Never     | Always    | Sometimes | Sometimes | Sometimes | Sometimes | Never     | 28 |
| 113 | Usually   | Never     | Always    | Usually   | Sometimes | Rarely    | Sometimes | Sometimes | Never  | Sometimes | Never     | Sometimes | Never     | Usually   | Sometimes | Sometimes | Never     | Usually   | Sometimes | Usually   | Sometimes | Sometimes | Rarely    | Sometimes | Sometimes | Never     | 25 |
| 114 | Sometimes | Sometimes | Sometimes | Sometimes | Sometimes | Usually   | Sometimes | Usually   | Never  | Sometimes | Usually   | Always    | Sometimes | Sometimes | Rarely    | Sometimes | Sometimes | Rarely    | Usually   | Rarely    | Sometimes | Sometimes | Rarely    | Usually   | Sometimes | Never     | 27 |
| 115 | Always    | Rarely    | Always    | Usually   | Sometimes | Always    | Sometimes | Never     | Never  | Never     | Rarely    | Sometimes | Never     | Sometimes | Never     | Always    | Usually   | Never     | Usually   | Never     | Rarely    | Never     | Rarely    | Never     | Rarely    | Never     | 22 |

|             |               |               |               |           |               |               |           |               |           |               |               |               |               |           |               |               |                       |               |               |               |               |               |               |               |               |               |        |
|-------------|---------------|---------------|---------------|-----------|---------------|---------------|-----------|---------------|-----------|---------------|---------------|---------------|---------------|-----------|---------------|---------------|-----------------------|---------------|---------------|---------------|---------------|---------------|---------------|---------------|---------------|---------------|--------|
| 1<br>1<br>6 | Someti<br>mes | Rarely        | Usuall<br>y   | Never     | Alwa<br>ys    | Usually       | Usually   | Rarely        | Nev<br>er | Someti<br>mes | Sometim<br>es | Usually       | Never         | Sometimes | Always        | Someti<br>mes | Ne<br>ver             | Alwa<br>ys    | Usuall<br>y   | Never         | Rarely        | Never         | Rarel<br>y    | Never         | Rarel<br>y    | Never         | 2<br>4 |
| 1<br>1<br>7 | Usuall<br>y   | Rarely        | Alway<br>s    | Never     | Somet<br>imes | Rarely        | Usually   | Never         | Nev<br>er | Rarely        | Always        | Always        | Never         | Usually   | Someti<br>mes | Usuall<br>y   | Ne<br>ver             | Usual<br>ly   | Usuall<br>y   | Never         | Rarely        | Rarely        | Rarel<br>y    | Rarel<br>y    | Neve<br>r     | Never         | 2<br>3 |
| 1<br>1<br>8 | Usuall<br>y   | Somet<br>imes | Alway<br>s    | Rarely    | Never         | Sometim<br>es | Sometimes | Someti<br>mes | Nev<br>er | Someti<br>mes | Usually       | Sometim<br>es | Someti<br>mes | Usually   | Someti<br>mes | Usuall<br>y   | Ra<br>rel<br>y        | Somet<br>imes | Alway<br>s    | Someti<br>mes | Rarely        | Rarely        | Neve<br>r     | Never         | Somet<br>imes | Never         | 2<br>5 |
| 1<br>1<br>9 | Never         | Rarely        | Rarely        | Rarely    | Alwa<br>ys    | Usually       | Sometimes | Someti<br>mes | Nev<br>er | Rarely        | Rarely        | Sometim<br>es | Someti<br>mes | Sometimes | Never         | Usuall<br>y   | So<br>me<br>tim<br>es | Somet<br>imes | Usuall<br>y   | Someti<br>mes | Usually       | Always        | Neve<br>r     | Never         | Somet<br>imes | Never         | 2<br>3 |
| 1<br>2<br>0 | Alway<br>s    | Rarely        | Rarely        | Always    | Somet<br>imes | Rarely        | Rarely    | Never         | Nev<br>er | Someti<br>mes | Always        | Always        | Never         | Always    | Never         | Rarely        | Ra<br>rel<br>y        | Somet<br>imes | Rarely        | Never         | Usually       | Never         | Somet<br>imes | Never         | Usual<br>ly   | Never         | 2<br>3 |
| 1<br>2<br>1 | Usuall<br>y   | Rarely        | Alway<br>s    | Usually   | Somet<br>imes | Rarely        | Sometimes | Usually       | Nev<br>er | Rarely        | Usually       | Usually       | Someti<br>mes | Usually   | Someti<br>mes | Somet<br>imes | Ra<br>rel<br>y        | Usual<br>ly   | Someti<br>mes | Rarely        | Someti<br>mes | Rarely        | Rarel<br>y    | Never         | Rarel<br>y    | Never         | 2<br>4 |
| 1<br>2<br>2 | Usuall<br>y   | Usuall<br>y   | Alway<br>s    | Usually   | Somet<br>imes | Sometim<br>es | Rarely    | Rarely        | Nev<br>er | Someti<br>mes | Usually       | Usually       | Never         | Rarely    | Rarely        | Rarely        | Ra<br>rel<br>y        | Usual<br>ly   | Rarely        | Rarely        | Usually       | Someti<br>mes | Usual<br>ly   | Rarel<br>y    | Alwa<br>ys    | Rarely        | 2<br>6 |
| 1<br>2<br>3 | Usuall<br>y   | Somet<br>imes | Someti<br>mes | Sometimes | Somet<br>imes | Sometim<br>es | Usually   | Someti<br>mes | Nev<br>er | Never         | Sometim<br>es | Sometim<br>es | Someti<br>mes | Usually   | Never         | Never         | So<br>me<br>tim<br>es | Somet<br>imes | Someti<br>mes | Someti<br>mes | Someti<br>mes | Never         | Somet<br>imes | Never         | Somet<br>imes | Never         | 2<br>2 |
| 1<br>2<br>4 | Never         | Never         | Alway<br>s    | Rarely    | Somet<br>imes | Never         | Never     | Always        | Nev<br>er | Never         | Never         | Never         | Usuall<br>y   | Never     | Usually       | Somet<br>imes | Ra<br>rel<br>y        | Alwa<br>ys    | Someti<br>mes | Usuall<br>y   | Usually       | Someti<br>mes | Never         | Usual<br>ly   | Rarely        | 2<br>3        |        |
| 1<br>2<br>5 | Someti<br>mes | Never         | Alway<br>s    | Never     | Never         | Usually       | Sometimes | Someti<br>mes | Nev<br>er | Someti<br>mes | Never         | Never         | Someti<br>mes | Always    | Rarely        | Somet<br>imes | So<br>me<br>tim<br>es | Alwa<br>ys    | Alway<br>s    | Someti<br>mes | Someti<br>mes | Someti<br>mes | Neve<br>r     | Somet<br>imes | Somet<br>imes | Never         | 2<br>6 |
| 1<br>2<br>6 | Alway<br>s    | Rarely        | Someti<br>mes | Always    | Somet<br>imes | Rarely        | Rarely    | Someti<br>mes | Nev<br>er | Alway<br>s    | Usually       | Rarely        | Rarely        | Sometimes | Always        | Rarely        | Ra<br>rel<br>y        | Usual<br>ly   | Rarely        | Someti<br>mes | Someti<br>mes | Always        | Rarel<br>y    | Never         | Somet<br>imes | Rarely        | 2<br>6 |
| 1<br>2<br>7 | Someti<br>mes | Never         | Usuall<br>y   | Sometimes | Somet<br>imes | Always        | Rarely    | Never         | Nev<br>er | Rarely        | Always        | Always        | Never         | Never     | Usually       | Never         | Ne<br>ver             | Rarel<br>y    | Alway<br>s    | Never         | Someti<br>mes | Never         | Somet<br>imes | Somet<br>imes | Alwa<br>ys    | Never         | 2<br>5 |
| 1<br>2<br>8 | Someti<br>mes | Somet<br>imes | Alway<br>s    | Rarely    | Somet<br>imes | Usually       | Sometimes | Someti<br>mes | Nev<br>er | Someti<br>mes | Sometim<br>es | Sometim<br>es | Someti<br>mes | Usually   | Someti<br>mes | Usuall<br>y   | So<br>me<br>tim<br>es | Usual<br>ly   | Usuall<br>y   | Someti<br>mes | Someti<br>mes | Someti<br>mes | Somet<br>imes | Somet<br>imes | Somet<br>imes | Never         | 3<br>0 |
| 1<br>2<br>9 | Usuall<br>y   | Usuall<br>y   | Alway<br>s    | Usually   | Somet<br>imes | Rarely        | Sometimes | Rarely        | Nev<br>er | Rarely        | Usually       | Always        | Never         | Usually   | Rarely        | Rarely        | Ne<br>ver             | Somet<br>imes | Someti<br>mes | Someti<br>mes | Someti<br>mes | Never         | Somet<br>imes | Rarel<br>y    | Usual<br>ly   | Never         | 2<br>5 |
| 1<br>3<br>0 | Alway<br>s    | Rarely        | Alway<br>s    | Sometimes | Alwa<br>ys    | Rarely        | Rarely    | Never         | Nev<br>er | Someti<br>mes | Sometim<br>es | Rarely        | Never         | Usually   | Always        | Rarely        | So<br>me<br>tim<br>es | Rarel<br>y    | Someti<br>mes | Never         | Usually       | Someti<br>mes | Usual<br>ly   | Rarel<br>y    | Somet<br>imes | Never         | 2<br>5 |
| 1<br>3<br>1 | Alway<br>s    | Somet<br>imes | Alway<br>s    | Sometimes | Somet<br>imes | Rarely        | Rarely    | Someti<br>mes | Nev<br>er | Rarely        | Always        | Sometim<br>es | Rarely        | Always    | Someti<br>mes | Somet<br>imes | Ne<br>ver             | Somet<br>imes | Usuall<br>y   | Usuall<br>y   | Someti<br>mes | Usually       | Rarel<br>y    | Rarel<br>y    | Somet<br>imes | Rarely        | 2<br>8 |
| 1<br>3<br>2 | Alway<br>s    | Rarely        | Usuall<br>y   | Usually   | Usual<br>ly   | Usually       | Rarely    | Rarely        | Nev<br>er | Usuall<br>y   | Always        | Sometim<br>es | Never         | Usually   | Someti<br>mes | Somet<br>imes | Ra<br>rel<br>y        | Somet<br>imes | Someti<br>mes | Rarely        | Someti<br>mes | Rarely        | Rarel<br>y    | Never         | Somet<br>imes | Never         | 2<br>5 |
| 1<br>3<br>3 | Alway<br>s    | Never         | Usuall<br>y   | Sometimes | Somet<br>imes | Never         | Never     | Never         | Nev<br>er | Someti<br>mes | Always        | Sometim<br>es | Never         | Usually   | Usually       | Never         | Ra<br>rel<br>y        | Rarel<br>y    | Someti<br>mes | Rarely        | Always        | Someti<br>mes | Somet<br>imes | Never         | Somet<br>imes | Someti<br>mes | 2<br>4 |
| 1<br>3<br>4 | Someti<br>mes | Rarely        | Usuall<br>y   | Sometimes | Usual<br>ly   | Sometim<br>es | Sometimes | Usually       | Nev<br>er | Rarely        | Sometim<br>es | Rarely        | Rarely        | Sometimes | Usually       | Rarely        | Ra<br>rel<br>y        | Usual<br>ly   | Alway<br>s    | Usuall<br>y   | Rarely        | Rarely        | Somet<br>imes | Never         | Neve<br>r     | Never         | 2<br>2 |
| 1<br>3<br>5 | Alway<br>s    | Rarely        | Usuall<br>y   | Usually   | Somet<br>imes | Sometim<br>es | Never     | Never         | Nev<br>er | Usuall<br>y   | Always        | Sometim<br>es | Never         | Usually   | Someti<br>mes | Never         | So<br>me<br>tim<br>es | Usual<br>ly   | Someti<br>mes | Never         | Rarely        | Someti<br>mes | Rarel<br>y    | Rarel<br>y    | Somet<br>imes | Never         | 2<br>4 |
| 1<br>3<br>6 | Usuall<br>y   | Somet<br>imes | Usuall<br>y   | Sometimes | Usual<br>ly   | Sometim<br>es | Never     | Never         | Nev<br>er | Someti<br>mes | Usually       | Usually       | Never         | Usually   | Never         | Somet<br>imes | So<br>me<br>tim<br>es | Somet<br>imes | Someti<br>mes | Never         | Usually       | Never         | Usual<br>ly   | Never         | Neve<br>r     | Never         | 2<br>4 |
| 1<br>3<br>7 | Usuall<br>y   | Never         | Alway<br>s    | Usually   | Rarel<br>y    | Rarely        | Sometimes | Never         | Nev<br>er | Someti<br>mes | Sometim<br>es | Usually       | Never         | Sometimes | Someti<br>mes | Somet<br>imes | So<br>me<br>tim<br>es | Alwa<br>ys    | Usuall<br>y   | Usuall<br>y   | Someti<br>mes | Someti<br>mes | Rarel<br>y    | Never         | Rarel<br>y    | Never         | 2<br>5 |



|             |               |               |               |           |               |               |           |               |            |               |               |               |               |           |               |               |                       |               |               |               |               |               |               |               |               |               |        |
|-------------|---------------|---------------|---------------|-----------|---------------|---------------|-----------|---------------|------------|---------------|---------------|---------------|---------------|-----------|---------------|---------------|-----------------------|---------------|---------------|---------------|---------------|---------------|---------------|---------------|---------------|---------------|--------|
|             |               |               |               |           |               |               |           |               |            |               |               |               |               |           |               |               | tim<br>es             |               |               |               |               |               |               |               |               |               |        |
| 1<br>6<br>0 | Someti<br>mes | Rarely        | Alway<br>s    | Rarely    | Rarel<br>y    | Sometim<br>es | Never     | Rarely        | Nev<br>er  | Rarely        | Rarely        | Rarely        | Rarely        | Rarely    | Someti<br>mes | Usuall<br>y   | Usual<br>ly           | Usual<br>ly   | Usuall<br>y   | Usuall<br>y   | Someti<br>mes | Someti<br>mes | Rarel<br>y    | Never         | Some<br>times | Never         | 1<br>9 |
| 1<br>6<br>1 | Never         | Rarely        | Someti<br>mes | Never     | Alwa<br>ys    | Usually       | Usually   | Someti<br>mes | Nev<br>er  | Never         | Never         | Rarely        | Usuall<br>y   | Sometimes | Always        | Somet<br>imes | Ra<br>rel<br>y        | Somet<br>imes | Alway<br>s    | Someti<br>mes | Someti<br>mes | Rarely        | Neve<br>r     | Somet<br>imes | Some<br>times | Never         | 2<br>4 |
| 1<br>6<br>2 | Someti<br>mes | Never         | Alway<br>s    | Never     | Alwa<br>ys    | Sometim<br>es | Never     | Rarely        | Nev<br>er  | Rarely        | Rarely        | Sometim<br>es | Never         | Sometimes | Always        | Somet<br>imes | Ne<br>ver             | Rarel<br>y    | Usuall<br>y   | Never         | Usually       | Never         | Rarel<br>y    | Never         | Some<br>times | Never         | 1<br>9 |
| 1<br>6<br>3 | Someti<br>mes | Never         | Usuall<br>y   | Never     | Somet<br>imes | Sometim<br>es | Never     | Usually       | Nev<br>er  | Never         | Never         | Sometim<br>es | Always        | Usually   | Never         | Never         | So<br>me<br>tim<br>es | Somet<br>imes | Alway<br>s    | Usuall<br>y   | Someti<br>mes | Never         | Neve<br>r     | Never         | Some<br>times | Never         | 2<br>2 |
| 1<br>6<br>4 | Never         | Never         | Usuall<br>y   | Sometimes | Alwa<br>ys    | Sometim<br>es | Rarely    | Usually       | Nev<br>er  | Never         | Never         | Sometim<br>es | Usuall<br>y   | Usually   | Never         | Somet<br>imes | Usual<br>ly           | Somet<br>imes | Usuall<br>y   | Someti<br>mes | Rarely        | Never         | Neve<br>r     | Never         | Some<br>times | Never         | 2<br>2 |
| 1<br>6<br>5 | Usuall<br>y   | Somet<br>imes | Alway<br>s    | Never     | Usual<br>ly   | Sometim<br>es | Sometimes | Never         | Nev<br>er  | Never         | Sometim<br>es | Sometim<br>es | Never         | Usually   | Usually       | Usuall<br>y   | Usual<br>ly           | Never         | Usuall<br>y   | Never         | Rarely        | Never         | Rarel<br>y    | Never         | Neve<br>r     | Never         | 2<br>2 |
| 1<br>6<br>6 | Alway<br>s    | Somet<br>imes | Alway<br>s    | Never     | Never         | Never         | Never     | Always        | Nev<br>er  | Someti<br>mes | Always        | Sometim<br>es | Someti<br>mes | Sometimes | Rarely        | Somet<br>imes | Ne<br>ver             | Somet<br>imes | Someti<br>mes | Someti<br>mes | Someti<br>mes | Rarely        | Some<br>times | Never         | Some<br>times | Never         | 2<br>4 |
| 1<br>6<br>7 | Never         | Never         | Alway<br>s    | Rarely    | Never         | Never         | Never     | Someti<br>mes | Nev<br>er  | Never         | Never         | Rarely        | Always        | Never     | Rarely        | Somet<br>imes | Ne<br>ver             | Rarel<br>y    | Alway<br>s    | Alway<br>s    | Someti<br>mes | Always        | Neve<br>r     | Never         | Usual<br>ly   | Usuall<br>y   | 2<br>2 |
| 1<br>6<br>8 | Usuall<br>y   | Somet<br>imes | Alway<br>s    | Sometimes | Usual<br>ly   | Sometim<br>es | Sometimes | Rarely        | Nev<br>er  | Someti<br>mes | Sometim<br>es | Always        | Rarely        | Usually   | Rarely        | Somet<br>imes | So<br>me<br>tim<br>es | Rarel<br>y    | Usuall<br>y   | Rarely        | Rarely        | Someti<br>mes | Some<br>times | Never         | Some<br>times | Never         | 2<br>5 |
| 1<br>6<br>9 | Someti<br>mes | Rarely        | Usuall<br>y   | Never     | Somet<br>imes | Sometim<br>es | Rarely    | Always        | Nev<br>er  | Never         | Sometim<br>es | Never         | Someti<br>mes | Rarely    | Always        | Somet<br>imes | Ra<br>rel<br>y        | Never         | Alway<br>s    | Someti<br>mes | Rarely        | Someti<br>mes | Neve<br>r     | Never         | Some<br>times | Never         | 2<br>0 |
| 1<br>7<br>0 | Alway<br>s    | Somet<br>imes | Someti<br>mes | Never     | Rarel<br>y    | Rarely        | Never     | Usually       | Nev<br>er  | Someti<br>mes | Always        | Always        | Someti<br>mes | Always    | Rarely        | Rarely        | So<br>me<br>tim<br>es | Rarel<br>y    | Usuall<br>y   | Someti<br>mes | Rarely        | Someti<br>mes | Neve<br>r     | Somet<br>imes | Some<br>times | Never         | 2<br>5 |
| 1<br>7<br>1 | Never         | Somet<br>imes | Someti<br>mes | Rarely    | Rarel<br>y    | Sometim<br>es | Rarely    | Usually       | Rare<br>ly | Someti<br>mes | Never         | Never         | Someti<br>mes | Never     | Usually       | Somet<br>imes | Ne<br>ver             | Alwa<br>ys    | Someti<br>mes | Alway<br>s    | Usually       | Someti<br>mes | Neve<br>r     | Somet<br>imes | Usual<br>ly   | Usuall<br>y   | 2<br>5 |
| 1<br>7<br>2 | Rarely        | Never         | Alway<br>s    | Usually   | Never         | Never         | Never     | Never         | Nev<br>er  | Never         | Never         | Never         | Never         | Never     | Always        | Rarely        | Ne<br>ver             | Alwa<br>ys    | Usuall<br>y   | Rarely        | Always        | Never         | Neve<br>r     | Never         | Alwa<br>ys    | Never         | 1<br>9 |
| 1<br>7<br>3 | Usuall<br>y   | Rarely        | Someti<br>mes | Sometimes | Somet<br>imes | Sometim<br>es | Sometimes | Never         | Nev<br>er  | Someti<br>mes | Always        | Usually       | Never         | Usually   | Someti<br>mes | Rarely        | So<br>me<br>tim<br>es | Usual<br>ly   | Usuall<br>y   | Never         | Rarely        | Someti<br>mes | Some<br>times | Somet<br>imes | Neve<br>r     | Rarely        | 2<br>4 |
| 1<br>7<br>4 | Alway<br>s    | Somet<br>imes | Usuall<br>y   | Usually   | Somet<br>imes | Rarely        | Rarely    | Rarely        | Nev<br>er  | Someti<br>mes | Usually       | Sometim<br>es | Never         | Always    | Someti<br>mes | Rarely        | Ra<br>rel<br>y        | Somet<br>imes | Someti<br>mes | Rarely        | Someti<br>mes | Someti<br>mes | Rarel<br>y    | Never         | Some<br>times | Rarely        | 2<br>2 |
| 1<br>7<br>5 | Never         | Never         | Alway<br>s    | Never     | Somet<br>imes | Never         | Always    | Never         | Nev<br>er  | Never         | Never         | Never         | Someti<br>mes | Never     | Never         | Alway<br>s    | Ra<br>rel<br>y        | Somet<br>imes | Usuall<br>y   | Never         | Usually       | Never         | Neve<br>r     | Somet<br>imes | Usual<br>ly   | Never         | 1<br>9 |
| 1<br>7<br>6 | Usuall<br>y   | Never         | Someti<br>mes | Sometimes | Usual<br>ly   | Sometim<br>es | Rarely    | Never         | Nev<br>er  | Someti<br>mes | Sometim<br>es | Sometim<br>es | Rarely        | Sometimes | Usually       | Rarely        | So<br>me<br>tim<br>es | Somet<br>imes | Someti<br>mes | Rarely        | Usually       | Someti<br>mes | Some<br>times | Never         | Some<br>times | Someti<br>mes | 2<br>2 |
| 1<br>7<br>7 | Someti<br>mes | Never         | Alway<br>s    | Never     | Somet<br>imes | Never         | Never     | Always        | Nev<br>er  | Never         | Sometim<br>es | Never         | Someti<br>mes | Sometimes | Someti<br>mes | Somet<br>imes | Ne<br>ver             | Never         | Alway<br>s    | Someti<br>mes | Never         | Never         | Neve<br>r     | Somet<br>imes | Neve<br>r     | Never         | 1<br>8 |
| 1<br>7<br>8 | Someti<br>mes | Never         | Usuall<br>y   | Never     | Rarel<br>y    | Sometim<br>es | Sometimes | Usually       | Nev<br>er  | Someti<br>mes | Rarely        | Sometim<br>es | Usuall<br>y   | Sometimes | Someti<br>mes | Somet<br>imes | Ne<br>ver             | Rarel<br>y    | Usuall<br>y   | Someti<br>mes | Someti<br>mes | Someti<br>mes | Some<br>times | Never         | Some<br>times | Never         | 2<br>1 |
| 1<br>7<br>9 | Never         | Never         | Alway<br>s    | Never     | Alwa<br>ys    | Rarely        | Never     | Always        | Nev<br>er  | Never         | Never         | Never         | Always        | Rarely    | Someti<br>mes | Never         | Ne<br>ver             | Never         | Usuall<br>y   | Someti<br>mes | Someti<br>mes | Never         | Neve<br>r     | Never         | Alwa<br>ys    | Never         | 2<br>0 |
| 1<br>8<br>0 | Alway<br>s    | Never         | Alway<br>s    | Never     | Usual<br>ly   | Rarely        | Sometimes | Never         | Nev<br>er  | Never         | Sometim<br>es | Sometim<br>es | Never         | Sometimes | Usually       | Usuall<br>y   | Ne<br>ver             | Never         | Alway<br>s    | Never         | Rarely        | Someti<br>mes | Neve<br>r     | Never         | Neve<br>r     | Never         | 2<br>0 |
| 1<br>8<br>1 | Someti<br>mes | Rarely        | Alway<br>s    | Never     | Usual<br>ly   | Sometim<br>es | Usually   | Someti<br>mes | Nev<br>er  | Rarely        | Sometim<br>es | Never         | Someti<br>mes | Never     | Never         | Alway<br>s    | So<br>me<br>tim<br>es | Never         | Usuall<br>y   | Never         | Never         | Never         | Neve<br>r     | Never         | Neve<br>r     | Never         | 1<br>8 |



|     |           |           |           |           |           |           |           |           |        |           |           |           |           |           |           |           |           |           |           |           |           |           |           |           |           |           |    |
|-----|-----------|-----------|-----------|-----------|-----------|-----------|-----------|-----------|--------|-----------|-----------|-----------|-----------|-----------|-----------|-----------|-----------|-----------|-----------|-----------|-----------|-----------|-----------|-----------|-----------|-----------|----|
| 182 | Sometimes | Rarely    | Always    | Rarely    | Always    | Always    | Rarely    | Sometimes | Never  | Never     | Rarely    | Rarely    | Never     | Rarely    | Rarely    | Usually   | Sometimes | Never     | Usually   | Rarely    | Sometimes | Sometimes | Rarely    | Rarely    | Rarely    | Never     | 18 |
| 183 | Rarely    | Never     | Always    | Never     | Usually   | Never     | Rarely    | Never     | Rarely | Sometimes | Sometimes | Always    | Never     | Always    | Never     | Never     | Never     | Sometimes | Rarely    | Rarely    | Always    | Always    | Rarely    | Never     | Rarely    | Never     | 20 |
| 184 | Sometimes | Sometimes | Usually   | Usually   | Sometimes | Never     | Rarely    | Sometimes | Never  | Usually   | Sometimes | Rarely    | Sometimes | Usually   | Sometimes | Rarely    | Rarely    | Usually   | Rarely    | Sometimes | Sometimes | Sometimes | Never     | Never     | Sometimes | Never     | 21 |
| 185 | Sometimes | Never     | Always    | Never     | Sometimes | Usually   | Sometimes | Rarely    | Never  | Sometimes | Usually   | Rarely    | Never     | Always    | Never     | Sometimes | Sometimes | Sometimes | Sometimes | Rarely    | Sometimes | Sometimes | Usually   | Never     | Never     | Never     | 22 |
| 186 | Usually   | Never     | Usually   | Sometimes | Sometimes | Never     | Never     | Rarely    | Never  | Sometimes | Always    | Always    | Never     | Sometimes | Sometimes | Never     | Sometimes | Never     | Sometimes | Rarely    | Usually   | Usually   | Never     | Never     | Always    | Never     | 24 |
| 187 | Never     | Never     | Always    | Never     | Usually   | Never     | Rarely    | Usually   | Never  | Never     | Never     | Never     | Sometimes | Rarely    | Always    | Rarely    | Never     | Sometimes | Always    | Never     | Sometimes | Sometimes | Never     | Never     | Sometimes | Never     | 18 |
| 188 | Always    | Sometimes | Usually   | Sometimes | Sometimes | Never     | Never     | Rarely    | Never  | Rarely    | Usually   | Sometimes | Sometimes | Usually   | Rarely    | Rarely    | Sometimes | Usually   | Sometimes | Rarely    | Usually   | Never     | Never     | Never     | Sometimes | Never     | 21 |
| 189 | Always    | Usually   | Always    | Sometimes | Sometimes | Never     | Never     | Usually   | Never  | Sometimes | Sometimes | Never     | Rarely    | Sometimes | Rarely    | Never     | Never     | Sometimes | Sometimes | Sometimes | Sometimes | Sometimes | Never     | Sometimes | Sometimes | Never     | 22 |
| 190 | Sometimes | Never     | Usually   | Sometimes | Usually   | Never     | Never     | Never     | Never  | Never     | Sometimes | Never     | Usually   | Sometimes | Always    | Sometimes | Sometimes | Usually   | Usually   | Never     | Usually   | Sometimes | Never     | Never     | Rarely    | Never     | 22 |
| 191 | Never     | Rarely    | Usually   | Never     | Usually   | Usually   | Sometimes | Never     | Never  | Never     | Sometimes | Never     | Rarely    | Rarely    | Usually   | Sometimes | Sometimes | Never     | Always    | Sometimes | Never     | Rarely    | Rarely    | Usually   | Rarely    | Never     | 18 |
| 192 | Usually   | Never     | Never     | Sometimes | Usually   | Usually   | Usually   | Rarely    | Never  | Never     | Sometimes | Usually   | Never     | Usually   | Sometimes | Sometimes | Rarely    | Never     | Usually   | Rarely    | Rarely    | Rarely    | Sometimes | Sometimes | Rarely    | Rarely    | 20 |
| 193 | Always    | Sometimes | Always    | Sometimes | Usually   | Sometimes | Sometimes | Sometimes | Never  | Rarely    | Sometimes | Rarely    | Never     | Sometimes | Always    | Sometimes | Sometimes | Usually   | Usually   | Rarely    | Rarely    | Rarely    | Never     | Never     | Never     | Never     | 24 |
| 194 | Sometimes | Rarely    | Usually   | Sometimes | Sometimes | Rarely    | Rarely    | Usually   | Never  | Never     | Sometimes | Usually   | Never     | Sometimes | Rarely    | Sometimes | Sometimes | Usually   | Sometimes | Sometimes | Sometimes | Sometimes | Sometimes | Rarely    | Sometimes | Never     | 21 |
| 195 | Usually   | Sometimes | Sometimes | Rarely    | Rarely    | Rarely    | Rarely    | Always    | Never  | Sometimes | Usually   | Usually   | Rarely    | Usually   | Never     | Rarely    | Never     | Sometimes | Sometimes | Sometimes | Sometimes | Rarely    | Sometimes | Sometimes | Sometimes | Never     | 21 |
| 196 | Usually   | Sometimes | Always    | Sometimes | Usually   | Rarely    | Rarely    | Never     | Never  | Sometimes | Always    | Sometimes | Never     | Rarely    | Sometimes | Sometimes | Rarely    | Sometimes | Sometimes | Rarely    | Usually   | Sometimes | Sometimes | Sometimes | Sometimes | Never     | 24 |
| 197 | Usually   | Sometimes | Usually   | Sometimes | Rarely    | Usually   | Sometimes | Rarely    | Never  | Rarely    | Sometimes | Sometimes | Sometimes | Usually   | Sometimes | Usually   | Rarely    | Never     | Usually   | Rarely    | Rarely    | Sometimes | Never     | Sometimes | Sometimes | Never     | 22 |
| 198 | Always    | Rarely    | Always    | Sometimes | Never     | Never     | Always    | Never     | Rarely | Never     | Sometimes | Rarely    | Never     | Sometimes | Usually   | Never     | Never     | Never     | Never     | Sometimes | Sometimes | Never     | Rarely    | Never     | Sometimes | Sometimes | 18 |
| 199 | Usually   | Sometimes | Usually   | Sometimes | Always    | Sometimes | Rarely    | Sometimes | Never  | Rarely    | Always    | Never     | Sometimes | Always    | Rarely    | Sometimes | Rarely    | Never     | Usually   | Rarely    | Rarely    | Sometimes | Never     | Never     | Never     | Never     | 22 |
| 200 | Always    | Never     | Always    | Rarely    | Always    | Sometimes | Sometimes | Never     | Never  | Rarely    | Sometimes | Rarely    | Rarely    | Rarely    | Usually   | Sometimes | Rarely    | Rarely    | Usually   | Sometimes | Sometimes | Rarely    | Sometimes | Rarely    | Sometimes | Never     | 21 |
| 201 | Usually   | Never     | Usually   | Rarely    | Sometimes | Usually   | Sometimes | Never     | Never  | Sometimes | Sometimes | Sometimes | Never     | Sometimes | Sometimes | Rarely    | Sometimes | Sometimes | Usually   | Rarely    | Sometimes | Sometimes | Never     | Never     | Usually   | Never     | 21 |
| 202 | Usually   | Usually   | Always    | Sometimes | Sometimes | Never     | Never     | Never     | Never  | Never     | Usually   | Rarely    | Never     | Sometimes | Rarely    | Never     | Sometimes | Never     | Sometimes | Never     | Usually   | Never     | Never     | Never     | Sometimes | Never     | 18 |

|     |           |           |           |           |           |           |           |           |        |           |           |           |           |           |           |           |           |           |           |           |           |           |           |           |           |           |    |
|-----|-----------|-----------|-----------|-----------|-----------|-----------|-----------|-----------|--------|-----------|-----------|-----------|-----------|-----------|-----------|-----------|-----------|-----------|-----------|-----------|-----------|-----------|-----------|-----------|-----------|-----------|----|
| 203 | Usually   | Sometimes | Always    | Usually   | Sometimes | Never     | Usually   | Rarely    | Never  | Sometimes | Sometimes | Never     | Never     | Never     | Never     | Never     | Usually   | Usually   | Sometimes | Sometimes | Usually   | Never     | Never     | Never     | Never     | Never     | 21 |
| 204 | Sometimes | Rarely    | Sometimes | Rarely    | Always    | Sometimes | Rarely    | Never     | Never  | Rarely    | Always    | Rarely    | Never     | Sometimes | Never     | Rarely    | Sometimes | Never     | Usually   | Never     | Sometimes | Never     | Sometimes | Never     | Usually   | Never     | 17 |
| 205 | Usually   | Sometimes | Usually   | Sometimes | Usually   | Sometimes | Sometimes | Rarely    | Never  | Rarely    | Rarely    | Rarely    | Never     | Always    | Rarely    | Sometimes | Sometimes | Rarely    | Sometimes | Rarely    | Sometimes | Sometimes | Sometimes | Sometimes | Sometimes | Never     | 21 |
| 206 | Always    | Rarely    | Sometimes | Always    | Sometimes | Never     | Never     | Never     | Never  | Sometimes | Sometimes | Rarely    | Sometimes | Sometimes | Never     | Never     | Never     | Sometimes | Usually   | Never     | Always    | Never     | Sometimes | Never     | Usually   | Never     | 21 |
| 207 | Sometimes | Never     | Always    | Sometimes | Never     | Rarely    | Never     | Sometimes | Never  | Sometimes | Rarely    | Never     | Never     | Always    | Never     | Sometimes | Never     | Sometimes | Rarely    | Sometimes | Usually   | Sometimes | Sometimes | Never     | Never     | Never     | 17 |
| 208 | Sometimes | Rarely    | Always    | Rarely    | Always    | Sometimes | Sometimes | Never     | Never  | Never     | Rarely    | Usually   | Rarely    | Sometimes | Usually   | Sometimes | Rarely    | Rarely    | Sometimes | Never     | Rarely    | Sometimes | Rarely    | Never     | Never     | Never     | 17 |
| 209 | Sometimes | Usually   | Always    | Rarely    | Sometimes | Never     | Never     | Sometimes | Never  | Never     | Rarely    | Never     | Rarely    | Rarely    | Usually   | Sometimes | Never     | Usually   | Always    | Rarely    | Never     | Sometimes | Never     | Sometimes | Rarely    | Never     | 18 |
| 210 | Sometimes | Rarely    | Always    | Usually   | Sometimes | Never     | Sometimes | Sometimes | Never  | Rarely    | Rarely    | Usually   | Rarely    | Sometimes | Never     | Rarely    | Rarely    | Sometimes | Sometimes | Sometimes | Sometimes | Sometimes | Never     | Sometimes | Sometimes | Never     | 19 |
| 211 | Rarely    | Never     | Usually   | Usually   | Sometimes | Rarely    | Never     | Rarely    | Never  | Rarely    | Rarely    | Sometimes | Sometimes | Rarely    | Usually   | Sometimes | Sometimes | Rarely    | Always    | Rarely    | Usually   | Rarely    | Never     | Sometimes | Sometimes | Never     | 18 |
| 212 | Sometimes | Rarely    | Usually   | Never     | Sometimes | Usually   | Rarely    | Never     | Never  | Sometimes | Sometimes | Always    | Sometimes | Usually   | Rarely    | Sometimes | Rarely    | Never     | Usually   | Never     | Sometimes | Rarely    | Sometimes | Never     | Sometimes | Never     | 20 |
| 213 | Sometimes | Never     | Usually   | Never     | Usually   | Sometimes | Never     | Never     | Never  | Usually   | Usually   | Sometimes | Rarely    | Sometimes | Never     | Never     | Rarely    | Always    | Sometimes | Never     | Sometimes | Never     | Rarely    | Never     | Sometimes | Never     | 18 |
| 214 | Sometimes | Rarely    | Always    | Rarely    | Never     | Sometimes | Never     | Never     | Never  | Never     | Sometimes | Usually   | Sometimes | Sometimes | Sometimes | Never     | Never     | Usually   | Always    | Sometimes | Sometimes | Never     | Rarely    | Never     | Sometimes | Never     | 19 |
| 215 | Sometimes | Never     | Always    | Sometimes | Never     | Never     | Never     | Never     | Never  | Sometimes | Sometimes | Sometimes | Never     | Always    | Sometimes | Sometimes | Never     | Sometimes | Sometimes | Never     | Rarely    | Sometimes | Never     | Rarely    | Never     | Never     | 16 |
| 216 | Rarely    | Sometimes | Always    | Sometimes | Sometimes | Rarely    | Rarely    | Sometimes | Rarely | Never     | Never     | Never     | Sometimes | Never     | Usually   | Rarely    | Rarely    | Always    | Sometimes | Usually   | Sometimes | Rarely    | Rarely    | Rarely    | Sometimes | Rarely    | 18 |
| 217 | Sometimes | Never     | Always    | Never     | Always    | Never     | Never     | Sometimes | Never  | Never     | Never     | Sometimes | Sometimes | Sometimes | Sometimes | Usually   | Sometimes | Never     | Usually   | Never     | Never     | Never     | Never     | Never     | Usually   | Never     | 19 |
| 218 | Always    | Rarely    | Always    | Sometimes | Sometimes | Never     | Usually   | Rarely    | Never  | Rarely    | Never     | Rarely    | Sometimes | Rarely    | Rarely    | Rarely    | Rarely    | Always    | Sometimes | Rarely    | Sometimes | Rarely    | Never     | Never     | Sometimes | Never     | 17 |
| 219 | Rarely    | Never     | Always    | Never     | Sometimes | Never     | Never     | Sometimes | Never  | Never     | Never     | Never     | Usually   | Never     | Rarely    | Sometimes | Sometimes | Usually   | Usually   | Never     | Rarely    | Sometimes | Never     | Never     | Always    | Never     | 17 |
| 220 | Never     | Rarely    | Usually   | Never     | Usually   | Usually   | Never     | Sometimes | Rarely | Never     | Never     | Never     | Sometimes | Never     | Usually   | Sometimes | Sometimes | Sometimes | Always    | Usually   | Sometimes | Rarely    | Never     | Never     | Rarely    | Never     | 19 |
| 221 | Usually   | Rarely    | Usually   | Sometimes | Usually   | Never     | Rarely    | Never     | Never  | Sometimes | Sometimes | Never     | Never     | Always    | Never     | Usually   | Rarely    | Rarely    | Sometimes | Never     | Sometimes | Never     | Sometimes | Never     | Never     | Never     | 17 |
| 222 | Sometimes | Sometimes | Usually   | Never     | Sometimes | Sometimes | Sometimes | Never     | Never  | Never     | Sometimes | Rarely    | Sometimes | Sometimes | Always    | Sometimes | Sometimes | Usually   | Usually   | Rarely    | Rarely    | Sometimes | Sometimes | Rarely    | Rarely    | Sometimes | 22 |
| 223 | Never     | Never     | Always    | Never     | Never     | Never     | Never     | Always    | Never  | Sometimes | Never     | Never     | Always    | Never     | Sometimes | Never     | Never     | Sometimes | Usually   | Always    | Sometimes | Never     | Never     | Never     | Never     | Never     | 18 |
| 224 | Rarely    | Rarely    | Usually   | Rarely    | Always    | Rarely    | Never     | Sometimes | Never  | Never     | Never     | Rarely    | Sometimes | Sometimes | Never     | Rarely    | Always    | Always    | Always    | Sometimes | Rarely    | Rarely    | Rarely    | Never     | Sometimes | Never     | 19 |

|             |               |               |               |           |               |               |           |               |            |               |               |               |               |           |               |               |                       |               |               |               |               |               |               |               |               |               |        |
|-------------|---------------|---------------|---------------|-----------|---------------|---------------|-----------|---------------|------------|---------------|---------------|---------------|---------------|-----------|---------------|---------------|-----------------------|---------------|---------------|---------------|---------------|---------------|---------------|---------------|---------------|---------------|--------|
| 2<br>2<br>5 | Someti<br>mes | Rarely        | Someti<br>mes | Rarely    | Somet<br>imes | Sometim<br>es | Rarely    | Never         | Nev<br>er  | Someti<br>mes | Sometim<br>es | Rarely        | Never         | Sometimes | Someti<br>mes | Somet<br>imes | Ra<br>rel<br>y        | Somet<br>imes | Usuall<br>y   | Someti<br>mes | Someti<br>mes | Someti<br>mes | Usual<br>ly   | Rarel<br>y    | Some<br>times | Never         | 1<br>8 |
| 2<br>2<br>6 | Usuall<br>y   | Somet<br>imes | Alway<br>s    | Usually   | Never         | Never         | Never     | Rarely        | Nev<br>er  | Rarely        | Usually       | Sometim<br>es | Someti<br>mes | Sometimes | Someti<br>mes | Rarely        | Ne<br>ver             | Somet<br>imes | Someti<br>mes | Someti<br>mes | Rarely        | Someti<br>mes | Some<br>times | Rarel<br>y    | Rarel<br>y    | Never         | 1<br>9 |
| 2<br>2<br>7 | Someti<br>mes | Never         | Usuall<br>y   | Never     | Never         | Sometim<br>es | Never     | Never         | Nev<br>er  | Never         | Never         | Sometim<br>es | Never         | Usually   | Someti<br>mes | Never         | Ra<br>rel<br>y        | Somet<br>imes | Usuall<br>y   | Never         | Usually       | Someti<br>mes | Neve<br>r     | Never         | Usual<br>ly   | Never         | 1<br>6 |
| 2<br>2<br>8 | Alway<br>s    | Somet<br>imes | Someti<br>mes | Rarely    | Alwa<br>ys    | Rarely        | Rarely    | Rarely        | Nev<br>er  | Usuall<br>y   | Sometim<br>es | Sometim<br>es | Rarely        | Usually   | Someti<br>mes | Somet<br>imes | Ne<br>ver             | Rarel<br>y    | Rarely        | Never         | Someti<br>mes | Someti<br>mes | Rarel<br>y    | Somet<br>imes | Some<br>times | Never         | 2<br>0 |
| 2<br>2<br>9 | Alway<br>s    | Never         | Alway<br>s    | Never     | Somet<br>imes | Always        | Never     | Never         | Nev<br>er  | Never         | Never         | Never         | Someti<br>mes | Usually   | Someti<br>mes | Somet<br>imes | So<br>me<br>tim<br>es | Never         | Usuall<br>y   | Never         | Someti<br>mes | Never         | Neve<br>r     | Never         | Neve<br>r     | Never         | 1<br>9 |
| 2<br>3<br>0 | Someti<br>mes | Rarely        | Alway<br>s    | Never     | Somet<br>imes | Never         | Never     | Rarely        | Nev<br>er  | Never         | Sometim<br>es | Sometim<br>es | Never         | Rarely    | Always        | Never         | Ne<br>ver             | Usual<br>ly   | Usuall<br>y   | Never         | Someti<br>mes | Never         | Rarel<br>y    | Never         | Some<br>times | Never         | 1<br>6 |
| 2<br>3<br>1 | Usuall<br>y   | Rarely        | Someti<br>mes | Sometimes | Somet<br>imes | Never         | Rarely    | Never         | Nev<br>er  | Rarely        | Usually       | Sometim<br>es | Never         | Always    | Someti<br>mes | Never         | Ne<br>ver             | Somet<br>imes | Rarely        | Rarely        | Usually       | Rarely        | Rarel<br>y    | Never         | Usual<br>ly   | Never         | 1<br>7 |
| 2<br>3<br>2 | Someti<br>mes | Somet<br>imes | Someti<br>mes | Usually   | Somet<br>imes | Never         | Never     | Never         | Nev<br>er  | Someti<br>mes | Never         | Always        | Never         | Sometimes | Rarely        | Somet<br>imes | Ne<br>ver             | Never         | Usuall<br>y   | Never         | Rarely        | Someti<br>mes | Rarel<br>y    | Somet<br>imes | Some<br>times | Never         | 1<br>7 |
| 2<br>3<br>3 | Someti<br>mes | Somet<br>imes | Usuall<br>y   | Never     | Never         | Never         | Never     | Never         | Nev<br>er  | Someti<br>mes | Never         | Never         | Never         | Sometimes | Always        | Never         | Ne<br>ver             | Never         | Usuall<br>y   | Someti<br>mes | Rarely        | Never         | Some<br>times | Never         | Usual<br>ly   | Someti<br>mes | 1<br>6 |
| 2<br>3<br>4 | Rarely        | Rarely        | Someti<br>mes | Never     | Rarel<br>y    | Rarely        | Sometimes | Rarely        | Nev<br>er  | Someti<br>mes | Sometim<br>es | Sometim<br>es | Never         | Never     | Someti<br>mes | Usuall<br>y   | So<br>me<br>tim<br>es | Never         | Alway<br>s    | Someti<br>mes | Rarely        | Someti<br>mes | Neve<br>r     | Somet<br>imes | Neve<br>r     | Never         | 1<br>5 |
| 2<br>3<br>5 | Someti<br>mes | Rarely        | Usuall<br>y   | Sometimes | Somet<br>imes | Usually       | Sometimes | Never         | Nev<br>er  | Rarely        | Rarely        | Rarely        | Rarely        | Rarely    | Someti<br>mes | Somet<br>imes | Ra<br>rel<br>y        | Usual<br>ly   | Alway<br>s    | Someti<br>mes | Usually       | Someti<br>mes | Rarel<br>y    | Never         | Some<br>times | Never         | 2<br>0 |
| 2<br>3<br>6 | Someti<br>mes | Somet<br>imes | Usuall<br>y   | Sometimes | Somet<br>imes | Sometim<br>es | Sometimes | Someti<br>mes | Rare<br>ly | Rarely        | Sometim<br>es | Sometim<br>es | Someti<br>mes | Usually   | Someti<br>mes | Usuall<br>y   | So<br>me<br>tim<br>es | Somet<br>imes | Usuall<br>y   | Someti<br>mes | Someti<br>mes | Someti<br>mes | Some<br>times | Somet<br>imes | Some<br>times | Rarely        | 2<br>7 |
| 2<br>3<br>7 | Someti<br>mes | Never         | Usuall<br>y   | Sometimes | Usual<br>ly   | Sometim<br>es | Never     | Never         | Nev<br>er  | Never         | Usually       | Rarely        | Never         | Sometimes | Someti<br>mes | Never         | Ne<br>ver             | Alwa<br>ys    | Someti<br>mes | Never         | Someti<br>mes | Someti<br>mes | Some<br>times | Never         | Some<br>times | Never         | 1<br>9 |
| 2<br>3<br>8 | Rarely        | Never         | Usuall<br>y   | Sometimes | Alwa<br>ys    | Never         | Never     | Never         | Nev<br>er  | Someti<br>mes | Rarely        | Rarely        | Someti<br>mes | Usually   | Always        | Never         | Ra<br>rel<br>y        | Somet<br>imes | Someti<br>mes | Never         | Usually       | Someti<br>mes | Neve<br>r     | Never         | Rarel<br>y    | Never         | 1<br>8 |
| 2<br>3<br>9 | Usuall<br>y   | Rarely        | Alway<br>s    | Sometimes | Never         | Rarely        | Rarely    | Rarely        | Nev<br>er  | Someti<br>mes | Usually       | Usually       | Never         | Sometimes | Always        | Somet<br>imes | Ne<br>ver             | Never         | Someti<br>mes | Rarely        | Someti<br>mes | Someti<br>mes | Neve<br>r     | Never         | Some<br>times | Never         | 2<br>0 |
| 2<br>4<br>0 | Alway<br>s    | Never         | Alway<br>s    | Never     | Alwa<br>ys    | Never         | Sometimes | Never         | Nev<br>er  | Never         | Rarely        | Never         | Rarely        | Rarely    | Never         | Never         | Ne<br>ver             | Alwa<br>ys    | Alway<br>s    | Someti<br>mes | Rarely        | Never         | Neve<br>r     | Never         | Rarel<br>y    | Never         | 1<br>7 |
| 2<br>4<br>1 | Never         | Never         | Never         | Never     | Somet<br>imes | Never         | Never     | Usually       | Nev<br>er  | Never         | Never         | Never         | Always        | Never     | Usually       | Never         | So<br>me<br>tim<br>es | Somet<br>imes | Someti<br>mes | Usuall<br>y   | Someti<br>mes | Never         | Neve<br>r     | Never         | Usual<br>ly   | Never         | 1<br>6 |
| 2<br>4<br>2 | Someti<br>mes | Never         | Alway<br>s    | Usually   | Alwa<br>ys    | Rarely        | Never     | Never         | Nev<br>er  | Rarely        | Never         | Never         | Rarely        | Never     | Someti<br>mes | Rarely        | Ne<br>ver             | Never         | Usuall<br>y   | Never         | Someti<br>mes | Someti<br>mes | Neve<br>r     | Rarel<br>y    | Some<br>times | Rarely        | 1<br>5 |
| 2<br>4<br>3 | Rarely        | Somet<br>imes | Someti<br>mes | Never     | Usual<br>ly   | Never         | Rarely    | Usually       | Nev<br>er  | Never         | Never         | Never         | Usuall<br>y   | Never     | Rarely        | Rarely        | So<br>me<br>tim<br>es | Somet<br>imes | Usuall<br>y   | Someti<br>mes | Usually       | Never         | Neve<br>r     | Never         | Some<br>times | Never         | 1<br>6 |
| 2<br>4<br>4 | Someti<br>mes | Never         | Alway<br>s    | Never     | Rarel<br>y    | Never         | Never     | Usually       | Nev<br>er  | Never         | Never         | Never         | Usuall<br>y   | Never     | Never         | Somet<br>imes | So<br>me<br>tim<br>es | Never         | Alway<br>s    | Alway<br>s    | Never         | Never         | Neve<br>r     | Never         | Some<br>times | Never         | 1<br>7 |
| 2<br>4<br>5 | Someti<br>mes | Rarely        | Usuall<br>y   | Rarely    | Usual<br>ly   | Sometim<br>es | Sometimes | Rarely        | Nev<br>er  | Rarely        | Sometim<br>es | Sometim<br>es | Rarely        | Sometimes | Always        | Somet<br>imes | So<br>me<br>tim<br>es | Rarel<br>y    | Alway<br>s    | Rarely        | Rarely        | Rarely        | Rarel<br>y    | Rarel<br>y    | Some<br>times | Never         | 1<br>9 |
| 2<br>4<br>6 | Usuall<br>y   | Somet<br>imes | Usuall<br>y   | Sometimes | Somet<br>imes | Rarely        | Never     | Never         | Nev<br>er  | Never         | Sometim<br>es | Usually       | Never         | Sometimes | Someti<br>mes | Never         | Ra<br>rel<br>y        | Never         | Alway<br>s    | Never         | Rarely        | Never         | Neve<br>r     | Never         | Some<br>times | Never         | 1<br>6 |

|     |           |           |           |           |           |           |           |           |        |           |           |           |           |           |           |           |           |           |           |           |           |           |           |           |           |       |    |
|-----|-----------|-----------|-----------|-----------|-----------|-----------|-----------|-----------|--------|-----------|-----------|-----------|-----------|-----------|-----------|-----------|-----------|-----------|-----------|-----------|-----------|-----------|-----------|-----------|-----------|-------|----|
| 247 | Never     | Rarely    | Always    | Rarely    | Sometimes | Sometimes | Sometimes | Sometimes | Never  | Rarely    | Never     | Rarely    | Always    | Never     | Sometimes | Sometimes | Rarely    | Sometimes | Sometimes | Usually   | Sometimes | Never     | Never     | Sometimes | Never     | 19    |    |
| 248 | Never     | Sometimes | Usually   | Never     | Usually   | Rarely    | Rarely    | Sometimes | Rarely | Rarely    | Never     | Never     | Usually   | Sometimes | Usually   | Sometimes | Rarely    | Sometimes | Usually   | Rarely    | Sometimes | Never     | Never     | Sometimes | Rarely    | 17    |    |
| 249 | Sometimes | Rarely    | Usually   | Sometimes | Sometimes | Sometimes | Sometimes | Sometimes | Never  | Sometimes | Rarely    | Rarely    | Never     | Rarely    | Rarely    | Sometimes | Sometimes | Sometimes | Usually   | Sometimes | Usually   | Never     | Usually   | Never     | 20        |       |    |
| 250 | Rarely    | Never     | Always    | Never     | Sometimes | Sometimes | Sometimes | Rarely    | Never  | Never     | Rarely    | Never     | Never     | Rarely    | Always    | Usually   | Rarely    | Never     | Always    | Never     | Never     | Never     | Never     | Never     | Never     | 14    |    |
| 251 | Always    | Never     | Sometimes | Rarely    | Sometimes | Never     | Rarely    | Never     | Never  | Sometimes | Always    | Sometimes | Sometimes | Always    | Rarely    | Rarely    | Never     | Rarely    | Sometimes | Rarely    | Sometimes | Never     | Never     | Sometimes | Never     | 17    |    |
| 252 | Never     | Never     | Always    | Sometimes | Rarely    | Never     | Never     | Sometimes | Never  | Never     | Never     | Never     | Usually   | Rarely    | Sometimes | Sometimes | Rarely    | Always    | Sometimes | Sometimes | Usually   | Sometimes | Never     | Sometimes | Never     | 18    |    |
| 253 | Usually   | Never     | Always    | Sometimes | Always    | Never     | Never     | Rarely    | Never  | Never     | Sometimes | Never     | Never     | Usually   | Rarely    | Rarely    | Sometimes | Sometimes | Always    | Never     | Never     | Never     | Never     | Sometimes | Never     | 18    |    |
| 254 | Sometimes | Never     | Sometimes | Never     | Usually   | Rarely    | Rarely    | Sometimes | Never  | Sometimes | Sometimes | Sometimes | Never     | Usually   | Sometimes | Sometimes | Rarely    | Never     | Usually   | Sometimes | Sometimes | Never     | Never     | Sometimes | Rarely    | 17    |    |
| 255 | Never     | Never     | Usually   | Never     | Sometimes | Never     | Never     | Always    | Never  | Rarely    | Never     | Never     | Always    | Never     | Never     | Never     | Never     | Rarely    | Usually   | Always    | Sometimes | Never     | Never     | Never     | Never     | 15    |    |
| 256 | Sometimes | Rarely    | Usually   | Sometimes | Usually   | Rarely    | Sometimes | Sometimes | Never  | Never     | Rarely    | Rarely    | Usually   | Sometimes | Rarely    | Rarely    | Rarely    | Usually   | Sometimes | Sometimes | Sometimes | Rarely    | Never     | Rarely    | Sometimes | Never | 17 |
| 257 | Usually   | Sometimes | Usually   | Rarely    | Usually   | Sometimes | Never     | Never     | Never  | Rarely    | Sometimes | Usually   | Never     | Usually   | Rarely    | Sometimes | Rarely    | Never     | Usually   | Never     | Sometimes | Rarely    | Sometimes | Rarely    | Never     | 18    |    |
| 258 | Sometimes | Sometimes | Usually   | Rarely    | Rarely    | Never     | Sometimes | Sometimes | Never  | Sometimes | Rarely    | Sometimes | Sometimes | Sometimes | Sometimes | Usually   | Sometimes | Sometimes | Usually   | Sometimes | Sometimes | Rarely    | Rarely    | Rarely    | Sometimes | Never | 20 |
| 259 | Never     | Never     | Usually   | Sometimes | Usually   | Never     | Never     | Never     | Rarely | Never     | Never     | Never     | Sometimes | Never     | Rarely    | Usually   | Never     | Usually   | Usually   | Never     | Sometimes | Never     | Never     | Sometimes | Never     | 14    |    |
| 260 | Usually   | Rarely    | Sometimes | Sometimes | Usually   | Rarely    | Rarely    | Never     | Never  | Never     | Sometimes | Sometimes | Sometimes | Rarely    | Usually   | Rarely    | Never     | Rarely    | Usually   | Never     | Usually   | Rarely    | Never     | Sometimes | Never     | 16    |    |
| 261 | Usually   | Never     | Always    | Usually   | Never     | Never     | Never     | Never     | Never  | Sometimes | Usually   | Never     | Never     | Sometimes | Sometimes | Never     | Sometimes | Rarely    | Never     | Never     | Sometimes | Never     | Never     | Never     | Never     | 15    |    |
| 262 | Sometimes | Rarely    | Always    | Never     | Never     | Never     | Rarely    | Never     | Never  | Rarely    | Sometimes | Rarely    | Rarely    | Sometimes | Usually   | Usually   | Sometimes | Sometimes | Usually   | Never     | Sometimes | Rarely    | Sometimes | Rarely    | Never     | 16    |    |
| 263 | Sometimes | Never     | Sometimes | Always    | Rarely    | Never     | Rarely    | Never     | Never  | Sometimes | Sometimes | Usually   | Rarely    | Never     | Never     | Rarely    | Never     | Sometimes | Sometimes | Never     | Usually   | Sometimes | Never     | Usually   | Never     | 16    |    |
| 264 | Never     | Never     | Usually   | Never     | Sometimes | Usually   | Never     | Never     | Never  | Never     | Never     | Sometimes | Never     | Never     | Rarely    | Usually   | Usually   | Sometimes | Usually   | Sometimes | Sometimes | Rarely    | Never     | Rarely    | Never     | 15    |    |
| 265 | Never     | Never     | Usually   | Sometimes | Sometimes | Never     | Never     | Never     | Never  | Sometimes | Never     | Never     | Usually   | Rarely    | Usually   | Sometimes | Sometimes | Never     | Usually   | Never     | Rarely    | Never     | Never     | Usually   | Never     | 15    |    |
| 266 | Always    | Sometimes | Rarely    | Sometimes | Sometimes | Never     | Never     | Always    | Never  | Rarely    | Sometimes | Sometimes | Rarely    | Never     | Sometimes | Never     | Never     | Sometimes | Sometimes | Usually   | Rarely    | Sometimes | Never     | Never     | Never     | Never | 17 |
| 267 | Never     | Never     | Always    | Never     | Sometimes | Never     | Rarely    | Sometimes | Never  | Never     | Never     | Never     | Usually   | Never     | Rarely    | Rarely    | Never     | Sometimes | Usually   | Sometimes | Rarely    | Usually   | Never     | Sometimes | Never     | 14    |    |
| 268 | Sometimes | Rarely    | Usually   | Sometimes | Sometimes | Sometimes | Sometimes | Rarely    | Never  | Rarely    | Rarely    | Usually   | Never     | Sometimes | Rarely    | Usually   | Never     | Rarely    | Always    | Rarely    | Rarely    | Rarely    | Rarely    | Rarely    | Never     | 15    |    |
| 269 | Sometimes | Rarely    | Sometimes | Usually   | Always    | Never     | Never     | Sometimes | Never  | Sometimes | Sometimes | Never     | Sometimes | Rarely    | Sometimes | Rarely    | Rarely    | Sometimes | Usually   | Rarely    | Rarely    | Sometimes | Never     | Sometimes | Rarely    | 17    |    |

|     |           |           |           |           |           |           |           |           |        |           |           |           |           |           |           |           |           |           |           |           |           |           |           |           |           |           |    |
|-----|-----------|-----------|-----------|-----------|-----------|-----------|-----------|-----------|--------|-----------|-----------|-----------|-----------|-----------|-----------|-----------|-----------|-----------|-----------|-----------|-----------|-----------|-----------|-----------|-----------|-----------|----|
| 270 | Usually   | Sometimes | Usually   | Rarely    | Never     | Never     | Sometimes | Usually   | Never  | Rarely    | Sometimes | Usually   | Sometimes | Sometimes | Sometimes | Never     | Rarely    | Sometimes | Sometimes | Never     | 22 |
| 271 | Sometimes | Never     | Usually   | Sometimes | Never     | Sometimes | Rarely    | Never     | Never  | Rarely    | Never     | Sometimes | Rarely    | Sometimes | Never     | Sometimes | Usually   | Never     | Sometimes | Never     | Sometimes | Sometimes | Sometimes | Never     | Sometimes | Never     | 15 |
| 272 | Rarely    | Never     | Always    | Never     | Rarely    | Sometimes | Usually   | Sometimes | Never  | Never     | Never     | Never     | Sometimes | Sometimes | Sometimes | Sometimes | Rarely    | Never     | Usually   | Sometimes | Sometimes | Sometimes | Never     | Never     | Sometimes | Sometimes | 18 |
| 273 | Sometimes | Rarely    | Usually   | Sometimes | Rarely    | Sometimes | Never     | Never     | Rarely | Rarely    | Sometimes | Rarely    | Never     | Never     | Sometimes | Sometimes | Rarely    | Usually   | Sometimes | Never     | Usually   | Never     | Rarely    | Rarely    | Rarely    | Usually   | 15 |
| 274 | Usually   | Sometimes | Always    | Never     | Never     | Sometimes | Sometimes | Never     | Never  | Rarely    | Usually   | Sometimes | Never     | Sometimes | Sometimes | Sometimes | Sometimes | Rarely    | Usually   | Never     | Rarely    | Rarely    | Sometimes | Never     | Sometimes | Never     | 19 |
| 275 | Sometimes | Never     | Always    | Never     | Sometimes | Sometimes | Never     | Never     | Never  | Never     | Never     | Never     | Never     | Rarely    | Sometimes | Never     | Never     | Always    | Always    | Never     | Sometimes | Never     | Never     | Never     | Sometimes | Never     | 15 |
| 276 | Never     | Never     | Sometimes | Never     | Sometimes | Never     | Rarely    | Usually   | Never  | Never     | Sometimes | Never     | Usually   | Rarely    | Always    | Never     | Never     | Never     | Usually   | Sometimes | Rarely    | Never     | Never     | Sometimes | Sometimes | Never     | 15 |
| 277 | Always    | Rarely    | Rarely    | Always    | Rarely    | Never     | Never     | Rarely    | Never  | Sometimes | Usually   | Sometimes | Never     | Sometimes | Sometimes | Never     | Never     | Usually   | Rarely    | Rarely    | Sometimes | Rarely    | Rarely    | Rarely    | Sometimes | Never     | 16 |
| 278 | Never     | Never     | Usually   | Never     | Rarely    | Never     | Never     | Usually   | Never  | Never     | Never     | Never     | Usually   | Never     | Rarely    | Usually   | Rarely    | Rarely    | Always    | Rarely    | Sometimes | Sometimes | Never     | Never     | Sometimes | Rarely    | 14 |
| 279 | Rarely    | Rarely    | Sometimes | Never     | Rarely    | Never     | Always    | Rarely    | Never  | Rarely    | Never     | Never     | Sometimes | Rarely    | Sometimes | Always    | Sometimes | Usually   | Usually   | Rarely    | Rarely    | Sometimes | Never     | Rarely    | Sometimes | Never     | 16 |
| 280 | Never     | Never     | Usually   | Never     | Always    | Never     | Never     | Never     | Rarely | Never     | Never     | Never     | Sometimes | Never     | Sometimes | Never     | Never     | Never     | Always    | Never     | Sometimes | Never     | Never     | Never     | Always    | Rarely    | 14 |
| 281 | Usually   | Never     | Usually   | Never     | Never     | Rarely    | Never     | Rarely    | Never  | Never     | Never     | Never     | Sometimes | Sometimes | Always    | Never     | Never     | Never     | Always    | Never     | 12 |
| 282 | Always    | Never     | Always    | Never     | Rarely    | Never     | Rarely    | Never     | Never  | Rarely    | Sometimes | Rarely    | Never     | Sometimes | Rarely    | Usually   | Never     | Never     | Usually   | Never     | Sometimes | Sometimes | Sometimes | Never     | Sometimes | Never     | 16 |
| 283 | Never     | Never     | Sometimes | Never     | Always    | Never     | Sometimes | Sometimes | Never  | Never     | Never     | Never     | Sometimes | Rarely    | Always    | Sometimes | Never     | Never     | Always    | Rarely    | Sometimes | Rarely    | Never     | Never     | Never     | Never     | 15 |
| 284 | Usually   | Never     | Usually   | Usually   | Sometimes | Never     | Never     | Never     | Never  | Sometimes | Sometimes | Never     | Sometimes | Never     | Sometimes | Never     | Sometimes | Never     | Never     | Never     | 12 |
| 285 | Never     | Never     | Sometimes | Never     | Usually   | Rarely    | Rarely    | Sometimes | Never  | Never     | Never     | Never     | Usually   | Never     | Sometimes | Never     | Never     | Never     | Always    | Rarely    | Sometimes | Rarely    | Never     | Never     | Usually   | Never     | 13 |
| 286 | Never     | Never     | Usually   | Rarely    | Sometimes | Sometimes | Sometimes | Sometimes | Never  | Never     | Rarely    | Rarely    | Sometimes | Usually   | Rarely    | Usually   | Rarely    | Never     | Always    | Rarely    | Rarely    | Rarely    | Never     | Never     | Never     | Never     | 14 |
| 287 | Rarely    | Never     | Usually   | Never     | Usually   | Never     | Sometimes | Sometimes | Never  | Sometimes | Sometimes | Sometimes | Sometimes | Rarely    | Sometimes | Usually   | Rarely    | Rarely    | Usually   | Sometimes | Rarely    | Rarely    | Never     | Never     | Sometimes | Never     | 17 |
| 288 | Never     | Never     | Always    | Never     | Always    | Never     | Never     | Never     | Never  | Never     | Sometimes | Never     | Sometimes | Never     | Sometimes | Sometimes | Rarely    | Never     | Usually   | Rarely    | Usually   | Never     | Never     | Never     | Sometimes | Never     | 15 |
| 289 | Never     | Never     | Never     | Never     | Sometimes | Never     | Never     | Never     | Never  | Never     | Never     | Never     | Always    | Never     | Never     | Never     | Never     | Never     | Always    | Never     | Always    | Never     | Never     | Never     | Always    | Never     | 13 |
| 290 | Never     | Never     | Usually   | Never     | Rarely    | Always    | Never     | Sometimes | Never  | Never     | Never     | Never     | Sometimes | Sometimes | Sometimes | Rarely    | Never     | Sometimes | Sometimes | Never     | Usually   | Never     | Never     | Never     | Sometimes | Never     | 14 |
| 291 | Sometimes | Sometimes | Always    | Never     | Never     | Sometimes | Never     | Always    | Never  | Never     | Never     | Never     | Sometimes | Never     | Never     | Never     | Never     | Never     | Always    | Sometimes | Sometimes | Never     | Never     | Never     | Sometimes | Sometimes | 17 |
| 292 | Usually   | Never     | Always    | Never     | Sometimes | Rarely    | Sometimes | Never     | Never  | Never     | Sometimes | Sometimes | Never     | Always    | Never     | Never     | Never     | Never     | Usually   | Never     | Never     | Sometimes | Sometimes | Never     | Never     | Never     | 17 |
| 293 | Rarely    | Never     | Sometimes | Sometimes | Sometimes | Sometimes | Rarely    | Rarely    | Never  | Sometimes | Sometimes | Sometimes | Usually   | Rarely    | Sometimes | Rarely    | Sometimes | Sometimes | Sometimes | Sometimes | Usually   | Usually   | Sometimes | Never     | Sometimes | Sometimes | 21 |

|             |               |               |               |           |               |               |           |               |            |               |               |               |               |           |               |               |                       |               |               |               |               |               |               |               |               |               |        |  |
|-------------|---------------|---------------|---------------|-----------|---------------|---------------|-----------|---------------|------------|---------------|---------------|---------------|---------------|-----------|---------------|---------------|-----------------------|---------------|---------------|---------------|---------------|---------------|---------------|---------------|---------------|---------------|--------|--|
|             |               |               |               |           |               |               |           |               |            |               |               |               |               |           |               |               | tim<br>es             |               |               |               |               |               |               |               |               |               |        |  |
| 2<br>9<br>4 | Someti<br>mes | Never         | Alway<br>s    | Never     | Usual<br>ly   | Rarely        | Never     | Never         | Nev<br>er  | Never         | Never         | Never         | Never         | Never     | Someti<br>mes | Never         | Ne<br>ver             | Somet<br>imes | Alway<br>s    | Never         | Never         | Never         | Neve<br>r     | Never         | Usual<br>ly   | Never         | 1<br>3 |  |
| 2<br>9<br>5 | Never         | Never         | Alway<br>s    | Never     | Never         | Never         | Never     | Someti<br>mes | Nev<br>er  | Never         | Never         | Never         | Someti<br>mes | Never     | Usually       | Somet<br>imes | Ra<br>rel<br>y        | Rarel<br>y    | Usuall<br>y   | Someti<br>mes | Rarely        | Never         | Neve<br>r     | Never         | Some<br>times | Never         | 1<br>2 |  |
| 2<br>9<br>6 | Never         | Rarely        | Someti<br>mes | Never     | Somet<br>imes | Never         | Rarely    | Never         | Nev<br>er  | Never         | Never         | Sometim<br>es | Never         | Rarely    | Someti<br>mes | Usuall<br>y   | Ne<br>ver             | Alwa<br>ys    | Usuall<br>y   | Never         | Rarely        | Someti<br>mes | Neve<br>r     | Never         | Rarel<br>y    | Rarely        | 1<br>2 |  |
| 2<br>9<br>7 | Rarely        | Rarely        | Alway<br>s    | Rarely    | Somet<br>imes | Sometim<br>es | Sometimes | Rarely        | Rare<br>ly | Never         | Sometim<br>es | Sometim<br>es | Never         | Rarely    | Rarely        | Usuall<br>y   | So<br>me<br>tim<br>es | Never         | Alway<br>s    | Never         | Rarely        | Someti<br>mes | Some<br>times | Rarel<br>y    | Rarel<br>y    | Rarely        | 1<br>6 |  |
| 2<br>9<br>8 | Never         | Never         | Alway<br>s    | Never     | Never         | Sometim<br>es | Rarely    | Someti<br>mes | Nev<br>er  | Never         | Never         | Sometim<br>es | Someti<br>mes | Sometimes | Rarely        | Never         | Ne<br>ver             | Usual<br>ly   | Alway<br>s    | Rarely        | Someti<br>mes | Never         | Neve<br>r     | Never         | Some<br>times | Never         | 1<br>5 |  |
| 2<br>9<br>9 | Someti<br>mes | Somet<br>imes | Someti<br>mes | Sometimes | Somet<br>imes | Sometim<br>es | Sometimes | Someti<br>mes | Nev<br>er  | Someti<br>mes | Sometim<br>es | Sometim<br>es | Never         | Sometimes | Someti<br>mes | Somet<br>imes | Ra<br>rel<br>y        | Somet<br>imes | Someti<br>mes | Someti<br>mes | Someti<br>mes | Someti<br>mes | Usual<br>ly   | Rarel<br>y    | Rarel<br>y    | Never         | 2<br>1 |  |
| 3<br>0<br>0 | Someti<br>mes | Never         | Alway<br>s    | Never     | Usual<br>ly   | Usually       | Sometimes | Never         | Nev<br>er  | Someti<br>mes | Sometim<br>es | Usually       | Never         | Sometimes | Someti<br>mes | Rarely        | Ne<br>ver             | Somet<br>imes | Someti<br>mes | Someti<br>mes | Someti<br>mes | Someti<br>mes | Neve<br>r     | Never         | Some<br>times | Never         | 2<br>1 |  |
| 3<br>0<br>1 | Never         | Rarely        | Usuall<br>y   | Sometimes | Somet<br>imes | Rarely        | Rarely    | Never         | Nev<br>er  | Never         | Never         | Never         | Someti<br>mes | Never     | Always        | Somet<br>imes | Ra<br>rel<br>y        | Somet<br>imes | Usuall<br>y   | Someti<br>mes | Rarely        | Someti<br>mes | Neve<br>r     | Rarel<br>y    | Rarel<br>y    | Never         | 1<br>4 |  |
| 3<br>0<br>2 | Usuall<br>y   | Rarely        | Usuall<br>y   | Sometimes | Somet<br>imes | Sometim<br>es | Sometimes | Never         | Nev<br>er  | Rarely        | Rarely        | Sometim<br>es | Someti<br>mes | Sometimes | Usually       | Somet<br>imes | Ra<br>rel<br>y        | Somet<br>imes | Usuall<br>y   | Never         | Never         | Never         | Neve<br>r     | Never         | Rarel<br>y    | Never         | 1<br>7 |  |
| 3<br>0<br>3 | Someti<br>mes | Rarely        | Usuall<br>y   | Rarely    | Rarel<br>y    | Rarely        | Always    | Never         | Nev<br>er  | Rarely        | Rarely        | Rarely        | Never         | Rarely    | Rarely        | Usuall<br>y   | Ne<br>ver             | Never         | Usuall<br>y   | Never         | Never         | Usually       | Neve<br>r     | Rarel<br>y    | Rarel<br>y    | Never         | 1<br>2 |  |
| 3<br>0<br>4 | Someti<br>mes | Somet<br>imes | Alway<br>s    | Rarely    | Somet<br>imes | Rarely        | Never     | Never         | Nev<br>er  | Never         | Never         | Rarely        | Someti<br>mes | Rarely    | Someti<br>mes | Rarely        | Ne<br>ver             | Usual<br>ly   | Someti<br>mes | Rarely        | Someti<br>mes | Usually       | Neve<br>r     | Never         | Some<br>times | Never         | 1<br>5 |  |
| 3<br>0<br>5 | Never         | Never         | Rarely        | Never     | Never         | Usually       | Never     | Never         | Nev<br>er  | Never         | Never         | Never         | Never         | Sometimes | Rarely        | Usuall<br>y   | Us<br>ual<br>ly       | Never         | Alway<br>s    | Never         | Never         | Someti<br>mes | Neve<br>r     | Never         | Some<br>times | Never         | 1<br>2 |  |
| 3<br>0<br>6 | Someti<br>mes | Never         | Alway<br>s    | Rarely    | Somet<br>imes | Never         | Rarely    | Rarely        | Nev<br>er  | Rarely        | Sometim<br>es | Rarely        | Rarely        | Sometimes | Someti<br>mes | Somet<br>imes | Ra<br>rel<br>y        | Somet<br>imes | Usuall<br>y   | Someti<br>mes | Someti<br>mes | Rarely        | Neve<br>r     | Rarel<br>y    | Some<br>times | Never         | 1<br>5 |  |
| 3<br>0<br>7 | Never         | Somet<br>imes | Alway<br>s    | Never     | Somet<br>imes | Rarely        | Never     | Never         | Nev<br>er  | Never         | Never         | Never         | Usuall<br>y   | Rarely    | Someti<br>mes | Rarely        | Ra<br>rel<br>y        | Usual<br>ly   | Usuall<br>y   | Someti<br>mes | Rarely        | Someti<br>mes | Neve<br>r     | Never         | Neve<br>r     | Never         | 1<br>4 |  |
| 3<br>0<br>8 | Alway<br>s    | Rarely        | Rarely        | Sometimes | Somet<br>imes | Never         | Never     | Never         | Nev<br>er  | Rarely        | Usually       | Never         | Never         | Usually   | Someti<br>mes | Somet<br>imes | Ra<br>rel<br>y        | Never         | Usuall<br>y   | Never         | Someti<br>mes | Never         | Neve<br>r     | Never         | Neve<br>r     | Never         | 1<br>4 |  |
| 3<br>0<br>9 | Never         | Never         | Never         | Never     | Never         | Never         | Never     | Usually       | Nev<br>er  | Never         | Sometim<br>es | Sometim<br>es | Someti<br>mes | Sometimes | Never         | Never         | Ne<br>ver             | Never         | Alway<br>s    | Someti<br>mes | Someti<br>mes | Never         | Neve<br>r     | Never         | Neve<br>r     | Never         | 1<br>1 |  |
| 3<br>1<br>0 | Someti<br>mes | Never         | Usuall<br>y   | Rarely    | Usual<br>ly   | Sometim<br>es | Rarely    | Rarely        | Nev<br>er  | Never         | Sometim<br>es | Rarely        | Never         | Rarely    | Someti<br>mes | Rarely        | Ne<br>ver             | Somet<br>imes | Usuall<br>y   | Someti<br>mes | Someti<br>mes | Someti<br>mes | Some<br>times | Somet<br>imes | Some<br>times | Never         | 1<br>7 |  |
| 3<br>1<br>1 | Never         | Never         | Usuall<br>y   | Never     | Never         | Usually       | Never     | Never         | Nev<br>er  | Never         | Never         | Never         | Never         | Rarely    | Never         | Usuall<br>y   | So<br>me<br>tim<br>es | Never         | Usuall<br>y   | Never         | Someti<br>mes | Never         | Neve<br>r     | Never         | Some<br>times | Never         | 1<br>1 |  |
| 3<br>1<br>2 | Someti<br>mes | Rarely        | Usuall<br>y   | Sometimes | Usual<br>ly   | Sometim<br>es | Rarely    | Someti<br>mes | Nev<br>er  | Someti<br>mes | Sometim<br>es | Sometim<br>es | Rarely        | Rarely    | Someti<br>mes | Rarely        | Ra<br>rel<br>y        | Somet<br>imes | Usuall<br>y   | Never         | Rarely        | Someti<br>mes | Neve<br>r     | Never         | Some<br>times | Never         | 1<br>7 |  |
| 3<br>1<br>3 | Rarely        | Never         | Alway<br>s    | Never     | Somet<br>imes | Never         | Rarely    | Never         | Nev<br>er  | Never         | Never         | Never         | Never         | Never     | Rarely        | Never         | Al<br>wa<br>ys        | Never         | Alway<br>s    | Never         | Rarely        | Never         | Neve<br>r     | Never         | Some<br>times | Someti<br>mes | 1<br>2 |  |
| 3<br>1<br>4 | Someti<br>mes | Rarely        | Someti<br>mes | Sometimes | Rarel<br>y    | Never         | Sometimes | Never         | Nev<br>er  | Rarely        | Sometim<br>es | Sometim<br>es | Never         | Usually   | Rarely        | Somet<br>imes | So<br>me<br>tim<br>es | Never         | Usuall<br>y   | Never         | Rarely        | Someti<br>mes | Some<br>times | Never         | Some<br>times | Never         | 1<br>5 |  |
| 3<br>1<br>5 | Someti<br>mes | Somet<br>imes | Usuall<br>y   | Never     | Somet<br>imes | Sometim<br>es | Rarely    | Never         | Nev<br>er  | Never         | Never         | Sometim<br>es | Never         | Sometimes | Never         | Never         | Ra<br>rel<br>y        | Somet<br>imes | Alway<br>s    | Rarely        | Someti<br>mes | Never         | Rarel<br>y    | Never         | Some<br>times | Never         | 1<br>4 |  |
| 3<br>1<br>6 | Never         | Never         | Usuall<br>y   | Rarely    | Somet<br>imes | Sometim<br>es | Rarely    | Rarely        | Nev<br>er  | Never         | Never         | Never         | Rarely        | Rarely    | Always        | Usuall<br>y   | Ne<br>ver             | Somet<br>imes | Someti<br>mes | Never         | Rarely        | Someti<br>mes | Neve<br>r     | Somet<br>imes | Some<br>times | Never         | 1<br>4 |  |



|     |           |           |           |           |           |           |           |           |           |           |           |           |           |           |           |           |           |           |           |           |           |           |           |           |           |           |        |    |
|-----|-----------|-----------|-----------|-----------|-----------|-----------|-----------|-----------|-----------|-----------|-----------|-----------|-----------|-----------|-----------|-----------|-----------|-----------|-----------|-----------|-----------|-----------|-----------|-----------|-----------|-----------|--------|----|
| 341 | Sometimes | Sometimes | Always    | Sometimes | Never     | Never     | Rarely    | Never     | Never     | Never     | Sometimes | Never     | Sometimes | Never     | Never     | Never     | Sometimes | Never     | Sometimes | Never     | 10     |    |
| 342 | Rarely    | Rarely    | Usually   | Never     | Rarely    | Never     | Rarely    | Never     | Never     | Never     | Never     | Never     | Rarely    | Rarely    | Sometimes | Never     | Rarely    | Usually   | Usually   | Sometimes | Sometimes | Rarely    | Never     | Never     | Sometimes | Never     | 10     |    |
| 343 | Never     | Never     | Usually   | Never     | Never     | Sometimes | Never     | Never     | Never     | Rarely    | Never     | Sometimes | Sometimes | Rarely    | Never     | Sometimes | Never     | Usually   | Usually   | Sometimes | Rarely    | Never     | Never     | Never     | Rarely    | Never     | 11     |    |
| 344 | Sometimes | Rarely    | Usually   | Rarely    | Sometimes | Sometimes | Sometimes | Sometimes | Never     | Never     | Rarely    | Rarely    | Sometimes | Sometimes | Rarely    | Sometimes | Never     | Never     | Always    | Rarely    | Rarely    | Rarely    | Never     | Never     | Sometimes | Never     | 14     |    |
| 345 | Never     | Never     | Sometimes | Never     | Never     | Never     | Never     | Sometimes | Never     | Never     | Never     | Never     | Always    | Never     | Sometimes | Rarely    | Never     | Never     | Usually   | Never     | Sometimes | Never     | Never     | Never     | Sometimes | Never     | 10     |    |
| 346 | Usually   | Sometimes | Sometimes | Sometimes | Sometimes | Never     | Rarely    | Never     | Never     | Never     | Sometimes | Sometimes | Rarely    | Rarely    | Rarely    | Rarely    | Never     | Never     | Usually   | Never     | Never     | Never     | Rarely    | Rarely    | Sometimes | Rarely    | 11     |    |
| 347 | Sometimes | Rarely    | Sometimes | Never     | Always    | Rarely    | Rarely    | Sometimes | Never     | Never     | Sometimes | Never     | Never     | Never     | Never     | Rarely    | Never     | Never     | Always    | Never     | Never     | Never     | Sometimes | Sometimes | Never     | Never     | 12     |    |
| 348 | Usually   | Never     | Usually   | Rarely    | Sometimes | Sometimes | Sometimes | Never     | Never     | Never     | Rarely    | Rarely    | Never     | Sometimes | Never     | Rarely    | Never     | Rarely    | Sometimes | Never     | Never     | Never     | Sometimes | Never     | Usually   | Never     | 12     |    |
| 349 | Never     | Never     | Sometimes | Sometimes | Never     | Never     | Never     | Sometimes | Never     | Rarely    | Never     | Never     | Sometimes | Never     | Always    | Never     | Never     | Never     | Rarely    | Rarely    | Sometimes | Never     | Never     | Never     | Never     | Never     | 8      |    |
| 350 | Sometimes | Never     | Sometimes | Rarely    | Sometimes | Sometimes | Never     | Rarely    | Never     | Rarely    | Sometimes | Rarely    | Never     | Sometimes | Rarely    | Rarely    | Never     | Sometimes | Usually   | Rarely    | Sometimes | Rarely    | Rarely    | Rarely    | Sometimes | Never     | 11     |    |
| 351 | Sometimes | Never     | Usually   | Never     | Sometimes | Never     | Never     | Never     | Never     | Never     | Rarely    | Sometimes | Never     | Rarely    | Rarely    | Rarely    | Never     | Sometimes | Always    | Rarely    | Sometimes | Rarely    | Rarely    | Never     | Rarely    | Rarely    | 10     |    |
| 352 | Sometimes | Rarely    | Always    | Sometimes | Sometimes | Never     | Never     | Never     | Never     | Never     | Sometimes | Never     | Rarely    | Sometimes | Never     | Sometimes | Never     | Rarely    | Never     | Never     | Usually   | Rarely    | Rarely    | Rarely    | Never     | Never     | 11     |    |
| 353 | Never     | Never     | Sometimes | Never     | Never     | Never     | Never     | Sometimes | Never     | Never     | Never     | Never     | Usually   | Never     | Never     | Never     | Never     | Sometimes | Always    | Never     | Usually   | Sometimes | Never     | Never     | Never     | Never     | 11     |    |
| 354 | Rarely    | Sometimes | Always    | Sometimes | Rarely    | Rarely    | Sometimes | Never     | Rarely    | Rarely    | Sometimes | Never     | Never     | Sometimes | Rarely    | Rarely    | Rarely    | Rarely    | Sometimes | Sometimes | Sometimes | Never     | Sometimes | Sometimes | Sometimes | Never     | Rarely | 14 |
| 355 | Sometimes | Rarely    | Sometimes | Never     | Sometimes | Never     | Never     | Sometimes | Sometimes | Rarely    | Sometimes | Rarely    | Never     | Sometimes | Sometimes | Never     | Never     | Never     | Sometimes | Rarely    | Sometimes | Never     | Never     | Never     | Sometimes | Sometimes | 12     |    |
| 356 | Rarely    | Never     | Sometimes | Never     | Always    | Rarely    | Never     | Never     | Never     | Never     | Never     | Never     | Rarely    | Never     | Rarely    | Sometimes | Rarely    | Never     | Usually   | Never     | Rarely    | Never     | Never     | Rarely    | Never     | Sometimes | 8      |    |
| 357 | Usually   | Sometimes | Usually   | Sometimes | Rarely    | Sometimes | Sometimes | Never     | Never     | Rarely    | Never     | Sometimes | Never     | Sometimes | Never     | Sometimes | Never     | Never     | Usually   | Never     | Rarely    | Rarely    | Rarely    | Rarely    | Rarely    | Never     | 13     |    |
| 358 | Sometimes | Never     | Sometimes | Usually   | Never     | Never     | Never     | Never     | Never     | Rarely    | Rarely    | Always    | Rarely    | Never     | Never     | Never     | Never     | Sometimes | Never     | 8      |    |
| 359 | Sometimes | Sometimes | Sometimes | Never     | Rarely    | Never     | Sometimes | Rarely    | Never     | Rarely    | Sometimes | Sometimes | Rarely    | Sometimes | Sometimes | Sometimes | Never     | Never     | Usually   | Never     | Rarely    | Rarely    | Sometimes | Sometimes | Sometimes | Never     | 14     |    |
| 360 | Usually   | Never     | Usually   | Never     | Rarely    | Never     | Never     | Never     | Never     | Always    | Never     | 7      |    |
| 361 | Never     | Never     | Sometimes | Never     | Sometimes | Never     | Never     | Sometimes | Never     | Never     | Never     | Never     | Always    | Never     | Sometimes | Never     | Never     | Never     | Sometimes | Never     | Sometimes | Never     | Never     | Never     | Never     | Never     | 9      |    |
| 362 | Rarely    | Never     | Rarely    | Never     | Sometimes | Sometimes | Sometimes | Never     | Never     | Never     | Rarely    | Never     | Never     | Rarely    | Rarely    | Always    | Never     | Never     | Always    | Never     | Never     | Never     | Never     | Rarely    | Never     | Never     | 9      |    |
| 363 | Sometimes | Rarely    | Rarely    | Rarely    | Never     | Rarely    | Sometimes | Sometimes | Never     | Never     | Never     | Never     | Never     | Rarely    | Sometimes | Rarely    | Rarely    | Never     | Always    | Never     | Sometimes | Never     | Never     | Never     | Never     | Never     | 9      |    |
| 364 | Sometimes | Never     | Usually   | Rarely    | Rarely    | Sometimes | Sometimes | Never     | Never     | Sometimes | Sometimes | Sometimes | Never     | Sometimes | Never     | Sometimes | Sometimes | Usually   | Sometimes | Never     | Sometimes | Sometimes | Rarely    | Never     | Sometimes | Never     | 17     |    |



|     |           |           |           |           |           |           |           |           |           |           |           |           |           |           |           |           |           |           |           |           |           |           |           |           |           |           |       |    |
|-----|-----------|-----------|-----------|-----------|-----------|-----------|-----------|-----------|-----------|-----------|-----------|-----------|-----------|-----------|-----------|-----------|-----------|-----------|-----------|-----------|-----------|-----------|-----------|-----------|-----------|-----------|-------|----|
| 365 | Rarely    | Sometimes | Sometimes | Sometimes | Sometimes | Sometimes | Sometimes | Rarely    | Never     | Sometimes | Sometimes | Rarely    | Rarely    | Sometimes | Sometimes | Sometimes | Never     | Sometimes | Sometimes | Sometimes | Sometimes | Sometimes | Rarely    | Rarely    | Never     | 17        |       |    |
| 366 | Rarely    | Never     | Usually   | Rarely    | Always    | Sometimes | Rarely    | Sometimes | Never     | Sometimes | Never     | Never     | Sometimes | Rarely    | Never     | Rarely    | Rarely    | Usually   | Sometimes | Sometimes | Never     | Rarely    | Never     | Rarely    | Never     | 13        |       |    |
| 367 | Never     | Never     | Sometimes | Never     | Sometimes | Never     | Never     | Sometimes | Never     | Never     | Never     | Never     | Always    | Never     | Rarely    | Never     | Never     | Sometimes | Sometimes | Sometimes | Usually   | Never     | Never     | Rarely    | Never     | 11        |       |    |
| 368 | Sometimes | Never     | Always    | Sometimes | Rarely    | Never     | Sometimes | Never     | Never     | Never     | Never     | Rarely    | Sometimes | Rarely    | Sometimes | Sometimes | Sometimes | Sometimes | Rarely    | Never     | Sometimes | Never     | Never     | Rarely    | Never     | 13        |       |    |
| 369 | Rarely    | Never     | Never     | Rarely    | Never     | Always    | Never     | Never     | Always    | Never     | Never     | Never     | Never     | Never     | Never     | Sometimes | Never     | 7     |    |
| 370 | Rarely    | Rarely    | Sometimes | Rarely    | Sometimes | Usually   | Rarely    | Rarely    | Never     | Rarely    | Sometimes | Sometimes | Rarely    | Sometimes | Rarely    | Sometimes | Rarely    | Sometimes | Rarely    | Rarely    | Never     | Sometimes | Never     | Sometimes | Never     | Sometimes | Never | 11 |
| 371 | Usually   | Rarely    | Usually   | Rarely    | Rarely    | Never     | Never     | Never     | Never     | Sometimes | Rarely    | Never     | Never     | Rarely    | Never     | Rarely    | Never     | Sometimes | Never     | 7     |    |
| 372 | Usually   | Never     | Sometimes | Rarely    | Sometimes | Never     | Sometimes | Never     | Never     | Never     | Never     | Never     | Usually   | Never     | Never     | Never     | Never     | Never     | Usually   | Never     | 9     |    |
| 373 | Never     | Never     | Always    | Never     | Sometimes | Never     | Never     | Always    | Never     | Never     | Never     | Never     | Never     | Sometimes | Never     | 8     |    |
| 374 | Sometimes | Never     | Sometimes | Sometimes | Rarely    | Never     | Rarely    | Never     | Never     | Never     | Rarely    | Never     | Rarely    | Rarely    | Never     | Sometimes | Never     | Sometimes | Sometimes | Sometimes | Usually   | Rarely    | Never     | Never     | Sometimes | Never     | 10    |    |
| 375 | Sometimes | Rarely    | Sometimes | Sometimes | Usually   | Rarely    | Never     | Never     | Never     | Never     | Rarely    | Rarely    | Rarely    | Never     | Usually   | Rarely    | Never     | Never     | Sometimes | Never     | Rarely    | Sometimes | Never     | Never     | Never     | Never     | 9     |    |
| 376 | Rarely    | Never     | Usually   | Rarely    | Rarely    | Never     | Never     | Never     | Sometimes | Never     | Rarely    | Never     | Sometimes | Rarely    | Never     | Rarely    | Never     | Rarely    | Usually   | Rarely    | Usually   | Never     | Never     | Rarely    | Sometimes | 9         |       |    |
| 377 | Rarely    | Rarely    | Sometimes | Rarely    | Sometimes | Sometimes | Sometimes | Never     | Never     | Never     | Never     | Never     | Usually   | Sometimes | Sometimes | Sometimes | Never     | Never     | Sometimes | Never     | Rarely    | Sometimes | Never     | Rarely    | Rarely    | Never     | 11    |    |
| 378 | Never     | Sometimes | Never     | Rarely    | Never     | Never     | Always    | Never     | Never     | Never     | Never     | Never     | Never     | Sometimes | Never     | 5     |    |
| 379 | Sometimes | Rarely    | Rarely    | Sometimes | Sometimes | Sometimes | Sometimes | Never     | Never     | Never     | Sometimes | Never     | Never     | Never     | Never     | Rarely    | Never     | Never     | Rarely    | Never     | Never     | Never     | Never     | Rarely    | Never     | Rarely    | Never | 6  |
| 380 | Sometimes | Rarely    | Sometimes | Rarely    | Sometimes | Rarely    | Rarely    | Sometimes | Never     | Never     | Sometimes | Rarely    | Rarely    | Sometimes | Sometimes | Sometimes | Rarely    | Rarely    | Rarely    | Rarely    | Sometimes | Sometimes | Rarely    | Rarely    | Rarely    | Never     | 10    |    |
| 381 | Sometimes | Never     | Usually   | Sometimes | Never     | Never     | Never     | Sometimes | Never     | Rarely    | Sometimes | Never     | Rarely    | Sometimes | Never     | Rarely    | Never     | Sometimes | Sometimes | Never     | Rarely    | Never     | Never     | Never     | Never     | Never     | 9     |    |
| 382 | Rarely    | Never     | Usually   | Never     | Sometimes | Never     | Never     | Sometimes | Never     | Rarely    | Never     | Never     | Never     | Never     | Never     | Rarely    | Rarely    | Never     | Rarely    | Sometimes | Rarely    | Sometimes | Sometimes | Never     | Never     | Never     | 8     |    |
| 383 | Never     | Never     | Never     | Sometimes | Sometimes | Never     | Sometimes | Rarely    | Rarely    | Rarely    | Never     | Never     | Usually   | Never     | Rarely    | Never     | Never     | Never     | Never     | Never     | 6     |    |
| 384 | Never     | Never     | Usually   | Never     | 2     |    |
| 385 | Sometimes | Sometimes | Rarely    | Rarely    | Rarely    | Never     | Never     | Never     | Never     | Never     | Rarely    | Never     | Sometimes | Never     | Rarely    | Never     | Never     | Never     | Sometimes | Never     | 4     |    |
